## **Validation of a multi-gene qPCR-based pharmacogenomics panel across major ethnic groups in Singapore and Indonesia**

### **Running Title**

Multi-gene qPCR-based PGx panel for Asians

### **Authors**

Anar Sanjaykumar KOTHARY<sup>1,\*</sup>, Caroline MAHENDRA<sup>1,\*</sup>, Mingchen TAN<sup>1</sup>, Eunice Jia Min TAN<sup>2</sup>, Jacelyn PHUA Hong Yi<sup>1</sup>, GABRIELLA<sup>1</sup>, TAN Xin Hui Jocelyn<sup>1</sup>, Jessline Stephanie HARUMAN<sup>1</sup>, Chun Kiat LEE<sup>2</sup>, Benedict YAN<sup>2,3</sup>, Astrid IRWANTO<sup>1,4,#</sup>

### **Affiliations**

<sup>1</sup>Nalagenetics Pte Ltd, Singapore, Singapore

<sup>2</sup>Department of Laboratory Medicine, National University Health System, Singapore

<sup>3</sup>Stronghold Diagnostics Lab, Agency for Science, Technology and Research, Singapore

<sup>4</sup>Department of Pharmacy, Faculty of Science, National University of Singapore, Singapore

\* equal contribution

# corresponding author: [astrid@nalagenetics.com](mailto:astrid@nalagenetics.com)

### **Acknowledgements**

We would like to thank Mr. Xie Zhicheng and Mr. Heng Khai Koon at the Genome Institute of Singapore for their assistance with performing the Agena VeriDose® Core and *CYP2D6* CNV Panel studies. We also thank Dr. Tan Zhihao for his feedback on the data analysis approach and manuscript, and PT Nalagenetik Riset Indonesia for their assistance in study recruitment and experimentation performed in Indonesia.

1 **Abstract**

2  
3 **Background** – With up to 70% of adverse drug reactions (ADRs) having high genetic associations, the clinical  
4 utility of pharmacogenomics (PGx) has been gaining traction. Nala PGx Core™ is a multi-gene qPCR-based panel  
5 that comprises 18 variants and 2 *CYP2D6* Copy Number markers across 4 pharmacogenes – *CYP2C9*, *CYP2C19*,  
6 *CYP2D6* and *SLCO1B1*.

7  
8 **Objectives** – In this study, we validated the performance of Nala PGx Core™ against benchmark methods, on the  
9 Singaporean and Indonesian populations. Additionally, we examined the allele and diplotype frequencies across 5  
10 major ethnic groups present in these populations namely, Indonesians, Chinese, Malays, Indians and Caucasians.

11  
12 **Methods** – Human gDNA samples, extracted from the buccal swabs of 246 participants, were tested on Nala PGx  
13 Core™ and two chosen benchmarks, Agena VeriDose® Core and *CYP2D6* Copy Number Variation (CNV) Panel,  
14 and TaqMan® DME Genotyping Assays. Performance was evaluated based on assay robustness, precision and  
15 accuracy at the genotype- and diplotype-level.

16  
17 **Results** – Nala PGx Core™ demonstrated high genotype- and diplotype-level call rates of >97% and >95%  
18 respectively in *CYP2D6*, and 100% for *CYP2C9*, *CYP2C19* and *SLCO1B1*. A precision rate of 100% was observed  
19 on both intra- and inter-precision studies. Variant-level concordance to the benchmark methods was ≥96.9% across  
20 all assays, which consequently resulted in a diplotype-level concordance of ≥94.7% across *CYP2C9*, *CYP2C19* and  
21 *CYP2D6*. Overall, the allele frequencies of *CYP2D6*\*10 and *CYP2D6*\*36 were higher in our cohort as compared to  
22 previous records. Notably, *CYP2D6* copy number variation (CNV) analysis demonstrated a *CYP2D6* \*10/\*36  
23 frequency of 26.5% amongst the Indonesian cohort.

24  
25 **Conclusion** –Nala PGx Core™ produced robust and accurate genotyping when compared to other established  
26 benchmarks. Furthermore, the panel successfully characterized alleles of clinical relevance in the Singaporean and  
27 Indonesian populations such as *CYP2D6*\*10 and *CYP2D6*\*36, suggesting its potential for adoption in clinical  
28 workflows regionally.

29  
30 **Keywords:** Pharmacogenomics; *CYP2C9*; *CYP2C19*; *CYP2D6*; *SLCO1B1*; qPCR; adverse drug reactions;  
31 Singapore; Indonesia.

32  
33 **Abstract count:** 290 words, 1764 characters

34 **Main text count:** 4337 words

## 35 Introduction

36 Pharmacogenomics (PGx) is a branch of medicine concerned with determining the response of an individual to  
37 therapeutic drugs using genetic and/or genomic information<sup>1</sup>. With up to 70% of adverse drug reactions (ADRs)  
38 having high genetic associations<sup>2</sup>, and the sunk cost of trial-and-error prescriptions amounting to USD 30 billion<sup>3</sup>,  
39 the clinical utility<sup>4</sup> of PGx appears to be gaining prominence.

40  
41 Applications of PGx include the genotyping of Cytochrome P450 (P450) enzymes which are significantly involved  
42 in drug metabolism and chemical toxicity<sup>5</sup>. *CYP2C9*, *CYP2C19* and *CYP2D6* display common polymorphisms that  
43 produce altered enzyme activity, often resulting in deviant drug metabolism that leads to side effects from drugs  
44 metabolized by them<sup>5</sup>.

45  
46 Alterations in *CYP2C9* can disrupt the metabolism of warfarin, while *CYP2C19* is associated with the metabolism of  
47 a number of drugs including clopidogrel, omeprazole and phenytoin<sup>6,7</sup>. The highly polymorphic *CYP2D6* has more  
48 than 100 variants and is responsible for the metabolism of approximately 25% of all clinically used drugs, including  
49 codeine, fluoxetine and amitriptyline<sup>7</sup>. For this reason, pharmaceuticals are particularly cautious in the development  
50 of drugs that are known to interact with these three P450s<sup>5</sup>. Additionally, pharmacogenes, such as *SLCO1B1*, are  
51 responsible for encoding transporters of simvastatin and other statins into tissues also affect their response upon  
52 intake in individuals. Variants of this gene are associated with increased risk of muscle pain (myalgia) and damage,  
53 including myopathy and in severe cases rhabdomyolysis<sup>8</sup>. Previous studies suggest the role of specific *CYP2C19*  
54 and *SLCO1B1* variants in the bioactivation of drugs such as clopidogrel and atorvastatin in the Singaporean  
55 population<sup>9,10</sup>. The *CYP2C19* variant, rs4986893, which is implicated in reduced clopidogrel metabolism, has been  
56 observed to be 50 times more prevalent in the Singaporean Chinese population than in Europeans<sup>10</sup>. The *SLCO1B1*  
57 variant, rs4149056, which is implicated in statin metabolism, has been observed to occur less frequently in the  
58 Singaporean population<sup>9</sup>. Taken together, these cases highlight the need to harness PGx testing to account for  
59 population differences in the personalization of prescriptions<sup>11</sup>.

60  
61 Current methods on PGx testing for the identification of genetic polymorphisms revolve around variant genotyping  
62 that utilize technologies ranging from Next Generation Sequencing (NGS), Microarray, Mass Spectrometry to  
63 Quantitative PCR (qPCR)<sup>1,6,12,13</sup>. Main considerations in the adoption of a platform include its robustness,  
64 effectiveness and cost-saving, especially in localities with limited resources. qPCR-based assays satisfy these criteria  
65 and are a preferred platform for clinical laboratories<sup>14-19</sup>. However, some of the available commercial kits are  
66 limited in their ability to test the 4 genes of interest mentioned above in a single panel<sup>20-25</sup>. Nala PGx Core™ is a  
67 qPCR-based multi-gene panel consisting of 20 pharmacogenomic variants that are associated with altered *CYP2C9*,  
68 *CYP2C19*, *CYP2D6* and *SLCO1B1* activity in Asian geographies. Our study aims to evaluate the performance of  
69 Nala PGx Core™ in effectively identifying genetic variations that may contribute to PGx-related clinical outcomes  
70 in Singapore and Indonesia, with a secondary objective of highlighting the allele and diplotype frequencies in the  
71 geographies examined.

## 72 **Methods and Materials**

### 73 **Ethics Approval**

74 Institutional Review Board (IRB) approval was granted by the Parkway Independent Ethics Committee (Singapore)  
75 under IRB Reference Number PIEC/2019/021 and Siloam Hospitals Ethics Review Committee (Jakarta, Indonesia)  
76 under IRB Reference Number 001/EA/KEPKK/RSMRCCC/V/2019.

### 77 **Study Recruitment**

78 Patients were recruited on behalf of Nalagenetics Pte. Ltd. with written informed consent forms from recruitment  
79 sites in Singapore and Indonesia. A total of 251 samples were evaluated from 5 major ethnic groups to ensure the  
80 representation of the major ethnic groups residing in both countries – Chinese, Malays, Indians, Caucasians and  
81 Indonesians. Participants identifying as one or more of the following ethnicities were categorized as Indonesians:  
82 Ambon, Batak, Betawi, Jawa, Lampung, Manado, Minangkabau, Nusa Tenggara Timur, Palembang, Sulawesi,  
83 Sunda, Timor Leste, Tolaki and Toraja.

84  
85 Buccal samples were collected using OraCollect (Cat No. DNA OCR-100 from DNA Genotek) and genomic DNA  
86 (gDNA) extracted using the Monarch Genomic DNA Purification Kit (Cat No. T3010 from NEB). The extraction  
87 procedure followed manufacturer's instructions with additional dry-spin step at maximum speed for 1 minute after  
88 the 2<sup>nd</sup> buffer washing step. The quality and concentration of gDNA extracts were quantified by NanoDrop 2000  
89 Spectrophotometer (Singapore) and BioDrop- $\mu$ LITE (Indonesia). Samples that failed to meet the DNA quality  
90 control criteria (n=5) of A260/280 >1.7 and DNA yield >500ng were excluded from the study. The remaining  
91 extracted gDNA samples (n=246) were stored at -20°C for downstream application.

### 92 **Nala PGx Core™**

93 The Nala PGx Core™ kit from Nalagenetics Pte. Ltd. consists of 20 qPCR-based variant assays across four genes –  
94 *CYP2C9*, *CYP2C19*, *CYP2D6* and *SLCO1B1*. Whilst assays for *CYP2C9*, *CYP2C19* and *CYP2D6* have been  
95 designed to enable the detection of specific star alleles, the *SLCO1B1* assay has been designed to detect the variant  
96 rs4149056, which is present in three reduced function haplotypes namely, *SLCO1B1*\*5, *SLCO1B1*\*15 and  
97 *SLCO1B1*\*17. The *SLCO1B1* assay is thus, unable to differentiate between each of the three aforementioned  
98 haplotypes. The variants covered by the kit are outlined in Table 1.

99  
100 Assays were set up on a 96-well plate. Human gDNA was added at a concentration of 2 ng/ $\mu$ L as template for the  
101 qPCR reaction, which was then performed on the Bio-Rad CFX96 IVD Touch™ Real-Time PCR Detection System  
102 per the product insert. Run analysis was performed using the application CFX Manager 3.1 or CFX Maestro, and  
103 exported as raw .csv files. Exported files were uploaded into the companion software, Nala Clinical Decision  
104 Support™ (Nala CDS™) for further analysis of variant genotyping, diplotype determination and phenotype

105 translation. Genotyping using Nala PGx Core™ was performed at the Molecular Diagnosis Centre, National  
106 University Health System, Singapore (NUHS MDC) and PT Nalagenetik Riset Indonesia.

#### 107 **Agena VeriDose® Core and *CYP2D6* Copy Number Variation (CNV) Panel**

108 The VeriDose® Core and *CYP2D6* Copy Number Variation (CNV) Panel from Agena Bioscience® consists of 68  
109 variant assays in 20 genes and 5 *CYP2D6* CNV assays, accompanied by a reporting software that automatically  
110 analyzes each variation<sup>26</sup>. Genotyping using Agena VeriDose Core and *CYP2D6* CNV Panel was performed at the  
111 Genome Institute of Singapore. Variants evaluated using this platform are listed in Table 1. The Agena VeriDose®  
112 Panel has been utilized by the United States Centers for Disease Control and Prevention (CDC) as part of their  
113 Genetic Testing Reference Material (GeT-RM) Coordination Program<sup>27</sup>.

#### 114 **TaqMan® Drug Metabolism Enzyme (DME) Genotyping Assay**

115 TaqMan® DME Genotyping Assays were utilized in the evaluation of *CYP2D6* rs769258 (TaqMan Assay ID  
116 AH21B9N) and *CYP2D6* rs267608319 (TaqMan Assay ID C\_\_27102444\_F0). Assays were set up on a 384-well  
117 plate<sup>28</sup> with a sample input of human gDNA at 2 ng/μL. The subsequent PCR reaction was performed on the  
118 Applied Biosystems ViiA™ 7 Real-Time PCR System as per the recommended cycling conditions, at the Genome  
119 Institute of Singapore. Post-PCR plate read was performed using the companion software, TaqMan® Genotyper™  
120 Software for single nucleotide polymorphisms (SNP) genotyping. Similar to the Agena VeriDose® Panel,  
121 TaqMan® DME Genotyping Assays were employed in the characterization of DNA samples as part of the CDC  
122 GeT-RM program<sup>27</sup>.

#### 123 124 **Robustness**

125 Genotype- and diplotype-level call rates were defined as the percentage of samples that returned a genotype at the  
126 variant-level or were assigned a distinct diplotype for the gene of interest, respectively. Failed tests were defined as  
127 samples that did not return a genotype and/or diplotype call for the genes evaluated.

$$\text{Call Rates, \%} = \frac{\text{Total Sample Size} - \text{Failed Tests}}{\text{Total Sample Size}} \times 100\%$$

128

## 129 Precision

130 Three samples at 3 DNA concentrations were tested across 3 reagent lots on 2 machines. Each test condition was  
131 repeated within the same plate for a triplicate. For variant assays that identified SNPs and indels, intra-precision was  
132 performed within the same plate, run as triplicates across 47 tests. Inter-precision was assessed from 120 tests  
133 performed across plate runs covering the 4 variables – samples, DNA concentration, reagent lots and machines.  
134 Concordance rates across precision studies were calculated as the percentage of tests that returned a genotype call  
135 concordant to the expected truth for each variant assay. Discordant genotype was defined as instances when the test  
136 returned a genotype call that was different from the expected truth.

$$\text{Concordance Rate, \%} = \frac{\text{No. Of Tests Performed} - \text{No. Of Tests With Discordant Genotype}}{\text{No. Of Tests Performed}} \times 100\%$$

137  
138 For *CYP2D6* CNV assays, copy number estimates for Intron 2 and Exon 9 of the three samples were derived based  
139 on their cycle threshold (Ct) results across plate runs.

$$\text{Copy Number} = 2 \times 2^{-\Delta\Delta\text{Ct}}$$

$$\Delta\Delta\text{Ct} = (\text{Ct}_{\text{reference gene calibrator}} - \text{Ct}_{\text{CYP2D6 calibrator}}) - (\text{Ct}_{\text{reference gene}} - \text{Ct}_{\text{CYP2D6 sample}})$$

140  
141  
142 Testing of the three samples was repeated for a number of plate runs, n (Table 5), and calculated for the average  
143 copy number of each sample and their coefficient of variation (CV). The CV for each plate run was calculated by  
144 finding the standard deviation ( $\sigma_{\text{plate}}$ ) between triplicates within the same plate run, and divided by the triplicate  
145 mean ( $\mu_{\text{plate}}$ ). The average of the individual CVs was reported as the intra-precision CV. For inter-precision CV,  
146 standard deviation population ( $\sigma_{\text{plate means}}$ ) was divided by the mean population, i.e. average of means.

$$\text{Intra- CV, \%} = \frac{\sum_n \frac{\sigma_{\text{plate}}}{\mu_{\text{plate}}}}{n} \times 100\%$$

$$\text{Inter- CV, \%} = \frac{\sigma_{\text{plate means}}}{\sum_n \mu_{\text{plate}} / n} \times 100\%$$

## 148 Accuracy

### 149 Variant-level Concordance

150 The accuracy of Nala PGx Core™ in genotyping at a variant-level was evaluated by comparing calls produced by  
151 Nala PGx Core™ assay against benchmark methods as listed in Table 1. Samples that successfully produced  
152 genotype calls for all variants tested on Nala PGx Core™ and its benchmarks were considered for the evaluation (n  
153 = 225). Samples that failed to produce a genotype call on one or more of the platforms were excluded from the  
154 concordance calculation (n = 21, Supplementary Table 8). Discordant calls were defined as instances in which Nala  
155 PGx Core™ provided a genotype call that was different from that of a call made by the corresponding benchmark.  
156 Percentage concordance to the benchmark was calculated per variant as follows –

$$\text{Concordance To Benchmark Per Variant, \%} = \frac{\text{Total Sample Size} - \text{Discordant Calls By Nala PGx Core}^{\text{TM}}}{\text{Total Sample Size}} \times 100\%$$

### 157 *Diplotype-level Concordance*

158 The accuracy of Nala PGx Core<sup>TM</sup> in assigning a diplotype call for *CYP2C9*, *CYP2C19*, and *CYP2D6*, was  
159 evaluated by comparing calls against the Agena VeriDose<sup>®</sup> Core and *CYP2D6* CNV Panel. Samples that met the  
160 following criteria were included in the sample size of each gene:

- 161 1. Successful genotype-level calls on the relevant platforms for all variants covered by the gene of interest
- 162 2. Successful assignment of a diplotype for the gene of interest on both Nala PGx Core<sup>TM</sup>, and Agena  
163 VeriDose<sup>®</sup> Core and *CYP2D6* CNV Panel

164 Discordant calls were defined as instances in which Nala PGx Core<sup>TM</sup> assigned a diplotype that differed from the  
165 call made by the Agena VeriDose<sup>®</sup> Core and *CYP2D6* CNV Panel.

$$\text{Concordance, \%} = \frac{\text{Total Sample Size} - \text{Discordant Calls By Nala PGx Core}^{\text{TM}}}{\text{Total Sample Size}} \times 100\%$$

### 166 **Frequencies By Ethnicity**

167 Ethnicities were obtained based on participant self-identification across both the population cohorts as part of the  
168 recruitment questionnaire. Participants that did not report an ethnic group in the recruitment form were excluded  
169 from the frequency analysis. The following were further excluded from the frequency analysis:

- 170 1. Samples in which participants did not report an ethnic group on the recruitment form (n=5)
- 171 2. Samples with one or more variant level failures across the 4 genes evaluated in Table 1 (n=18)
- 172 3. Samples with one or more diplotype-level failures (“No Call”) across *CYP2C9*, *CYP2C19*, and *CYP2D6* on  
173 Nala PGx Core<sup>TM</sup> and the Agena VeriDose<sup>®</sup> Core and *CYP2D6* CNV Panel (n=14)
- 174 4. Samples with discordant diplotype calls for the gene of interest (n=variable, Supplementary Table 6)

175  
176 The remaining samples were included in the allele-level frequency analysis of *CYP2C9* (n=206), *CYP2C19* (n=201),  
177 *CYP2D6* (n=195) and *SLCO1B1* (n=203), as well as in the diplotype-level frequency analysis of *CYP2C9* (n=206),  
178 *CYP2C19* (n=201) and *CYP2D6* (n=195). Allele and diplotype frequency values were derived using the following  
179 formulae<sup>29,30</sup>, for both the overall study cohort as well as for each ethnic group.

$$\text{Frequency Of Allele 'X' In A Given Population} = \frac{\text{Total Copies Of Allele 'X'}}{\text{Total Copies Of All Alleles For The Gene Of Interest}}$$

180

$$\text{Frequency Of Diplotype 'X' In A Given Population} = \frac{\text{Total Instances Of Diplotype 'X'}}{\text{Total Number Of Individuals In The Population}}$$

## 181 **Results**

### 182 **Robustness**

183 We first sought to evaluate the observed genotype- and diplotype-level call rates of the platforms evaluated in this  
184 study. 246 samples underwent variant genotyping and diplotype determination, across the four genes evaluated on  
185 the genotyping platforms (Tables 2, 3). The genotype-level call rates for Nala PGx Core™ were at 100% for  
186 *CYP2C9*, *CYP2C19* and *SLCO1B1*, and the diplotype-level call rates were at 100% for *CYP2C9* and *CYP2C19*. The  
187 benchmark platform, Agena VeriDose® Core Panel, demonstrated call rates of >98% at the genotype-level and  
188 >97% at the diplotype-level.

189  
190 Most variants in *CYP2D6*, except for seven, achieved 100% call rates on Nala PGx Core™, while the corresponding  
191 call rates of the benchmark platforms were observed to be between 95.9 – 99.2% on Agena VeriDose® Core and  
192 *CYP2D6* CNV Panel, and 100% on TaqMan® DME Genotyping Assays. Out of the seven aforementioned variants,  
193 Nala PGx Core™ demonstrated higher call rates than the benchmark for the genotyping of rs1065852, Intron 2 and  
194 Exon 9 variants. For rs3892097, rs769258, rs5030865, and rs267608319, the accompanying benchmarks  
195 demonstrated higher call rates. At the diplotype-level, Nala PGx Core™ demonstrated a *CYP2D6* call rate of 95.9%  
196 as compared to the benchmark, which was observed to be at 90.7% (Table 3).

### 197 **Precision**

198 A precision study was conducted to assess the consistency of Nala PGx Core™ for samples tested under the same  
199 conditions (intra-precision) and under different conditions (inter-precision). Both study resulted in 100%  
200 concordance for all assays across replicates, demonstrating consistent genotyping results across a range of DNA  
201 concentration, reagent lots and machine variations (Table 4). Precision of *CYP2D6* CNV assay was reported as the  
202 average copy number obtained for Intron 2 and Exon 9 of three samples, and their CV calculated across the test  
203 conditions (Table 5). The intra- CV ranged from 3-6% while inter- CV between 5-13%, demonstrating high  
204 precision of the assays across variables, where acceptable ranges were intra- CV below 10% and inter- CV below  
205 15%<sup>31</sup>.

### 206 **Accuracy**

#### 208 *Variant-level Concordance*

209 To assess the accuracy of the panel, 18 SNPs and 2 *CYP2D6* Copy Number assays were genotyped on the panel,  
210 Nala PGx Core™, against benchmark methods as listed in Table 1. The 225 sample cohort consisted of DNA  
211 samples isolated from buccal swabs that had successfully produced genotype calls for all variants tested on Nala  
212 PGx Core™ and its benchmarks. The sample size per genotype displayed in Table 6 refers to the genotype calls  
213 made by the benchmark.

214



215 11 variants (*CYP2C9* rs1799853, rs1057910; *CYP2C19* rs12248560; *CYP2D6* rs5030655, rs3892097, rs35742686,  
216 rs28371725, rs769258, rs5030656, rs59421388, rs267608319) were genotyped against Agena VeriDose® Core with  
217 a resulting concordance rate of 100% (N = 225 samples). Discordance was observed for *CYP2C19* rs4244285 (n=7),  
218 *CYP2C19* rs4986893 (n=3), *CYP2D6* rs1065852 (n=1), *CYP2D6* rs16947 (n=7), *CYP2D6* rs1135840 (n=5),  
219 *CYP2D6* rs5030865 (n=1) and *SLCO1B1* rs4149056 (n=6), with a mismatch rate of 0.44% to 3.1% for the affected  
220 assays. Overall, Nala PGx Core™ demonstrated >96% concordance to the benchmark, Agena VeriDose® Core, for  
221 the 16 variants across 225 samples (Table 6).

222  
223 Variants not present on Agena VeriDose® Core, *CYP2D6* rs769258 and *CYP2D6* rs267608319, were genotyped  
224 using TaqMan® DME Genotyping Assays. Nala PGx Core™ demonstrated 100% concordance (N = 225) to the  
225 benchmark for both SNPs.

226  
227 For the *CYP2D6* Intron 2 and Exon 9 Copy Number assays, concordance was observed to be at 99.6% and 98.7%  
228 respectively, against the Agena *CYP2D6* CNV Panel. Discordant calls were observed in samples with an Intron 2  
229 copy number greater than 3 (n=1), and for samples with an Exon 9 copy number of one (n=1) and two (n=2). The  
230 sample size per copy number displayed in Table 7 refers to the copy number calls made by the benchmark.

231  
232 A summary of the concordance percentage as well as the distribution of genotypes of each variant are displayed in  
233 Table 6. Similarly, the distribution of *CYP2D6* Intron 2 and Exon 9 copy numbers are displayed in Table 7.

#### 234 235 *Diploidy-level Concordance*

236 Following successful genotyping at the variant level, we investigated the accuracy of Nala PGx Core™ in assigning  
237 a diploidy call for *CYP2C9*, *CYP2C19* and *CYP2D6*, with reference to the Agena VeriDose® Core and *CYP2D6*  
238 CNV Panel. Table 8 displays the percentage concordance after the further exclusion of samples that demonstrated  
239 diploidy mismatches arising from technological differences, where technological differences refer to the varying  
240 allele coverage of each platform (Supplementary Table 7). These differences were derived from the variant lists of  
241 both Nala PGx Core™ (Table 1) and its benchmark, the Agena VeriDose® Core and *CYP2D6* CNV Panel<sup>26</sup>.

242  
243 Overall, a percentage agreement of 100% for *CYP2C9* (n=213), 96.4% for *CYP2C19* (n=223) and 94.7% for  
244 *CYP2D6* (n=209) was observed between Nala PGx Core™ and the benchmark. Discordance was observed at n=1  
245 for all diploidies listed in Table 8 except for the following with more than one discordant calls: *CYP2C19* \*2/\*2  
246 (n=4), and *CYP2D6* \*4/\*36 (n=2).

#### 247 248 **Frequencies By Ethnicity**

249 For samples that were concordant on Nala PGx Core™ and the benchmark platforms, we were able to observe the  
250 allele frequencies amongst the populations residing in Singapore and Indonesia (Table 9). From the combination of  
251 alleles present in individual's chromosome, we were able to observe both the diploidy and corresponding  
252 phenotype frequencies amongst our study population (Table 10).

253  
254 For *CYP2C9*, \*3 allele was the most common amongst Chinese and Malay, and \*2 allele amongst Caucasian, which  
255 is in line with PharmGKB's reported distribution for the East Asian and European populations respectively. Our  
256 study also reported \*3 allele as the more common variant in Indian population than \*2, as opposed to PharmGKB's  
257 frequency. These allele frequencies translated to \*1/\*3 as a common diplotype observed in Chinese, Malay and  
258 Indians, and \*1/\*2 in Caucasians.

259  
260 For *CYP2C19*, we observed highest frequency of *CYP2C19*\*2 amongst Chinese, Malay and Indonesian which were  
261 categorized as East Asian populations. This resulted into high frequency of \*1/\*2 heterozygous depicted as a  
262 common diplotype amongst the population. The alleles \*2 and \*17 were observed as the common variants at equal  
263 proportions of 0.229 in Indians and 0.138 in Caucasians. *CYP2C19*\*3 was a common minor allele least observed  
264 amongst Indians and Caucasians, 0 and 0.017 respectively. As a result, \*1/\*2 and \*1/\*17 were common diplotypes  
265 observed in Indian and Caucasian populations, and \*2/\*17 only seen in Indians.

266  
267 Common polymorphisms of *CYP2D6* in our population were seen in \*10 and \*36 alleles, at almost two-fold higher  
268 frequencies in Chinese, Malay and Indonesian than Indians. We noticed high frequencies of \*36 in our East Asian  
269 population. Additionally, two functional copies of \*36 allele were present in 1.4% of Chinese population who  
270 participated in our study (Figure 1). These alleles resulted in high frequency of \*10/\*36 as common diplotype  
271 amongst Chinese, Malay and Indonesian population. Our Indian population observed equal distribution of alleles \*2,  
272 \*10 and \*36, although PharmGKB reported only \*2 as the highest frequency in South Asians. The corresponding  
273 common diplotypes observed in Indians were of equal proportions in \*1/\*2, \*1/\*36 and \*1/\*10 ranging from 0.12 to  
274 0.16. The alleles \*2 and \*4 were most common amongst Caucasians as reported by PharmGKB in Europeans,  
275 resulting in common diplotypes of \*1/\*2 and \*1/\*4 in the population.

276  
277 For *SLCO1B1*, the frequencies of rs4149056 across all ethnicities were consistent with values reported in gnomAD,  
278 with the variant being most common amongst Caucasians (0.167) and least amongst Indians (0.040). The frequency  
279 amongst East Asians (0.125, gnomAD), as denoted by the Chinese and Indonesian ethnic groups in this study,  
280 ranged between 0.074 and 0.125 respectively.

281

## 282 Discussion

283 In this study, we evaluated the performance of Nala PGx Core™, a qPCR-based panel that evaluates 18 variants and  
284 2 *CYP2D6* Copy Number markers across 4 pharmacogenes with established relevance across major ethnic groups in  
285 Singapore and Indonesia population. Nala PGx Core™ comes coupled with a reporting software that supports  
286 variant detection, diplotype assignment, diplotype-to-phenotype translation and the generation of reports containing  
287 clinical recommendations for each phenotype. The panel demonstrated high genotype-level call rates of >97% for  
288 *CYP2D6*, and 100% for *CYP2C9*, *CYP2C19* AND *SLCO1B1*. Similarly, high diplotype-level call rates were  
289 observed at >95% for *CYP2D6*, and 100% for *CYP2C9* and *CYP2C19*. A precision of 100% was observed under the

290 same conditions (intra) and across different conditions (inter). In comparison to other established platforms serving  
291 as benchmarks during the study, Nala PGx Core™ had  $\geq 96.9\%$  concordance rate for all variant level assays, which  
292 consequently resulted in  $\geq 94.7\%$  concordance at a diplotype level across *CYP2C9*, *CYP2C19* and *CYP2D6*.

293  
294 Failures to produce a variant genotype call could be attributed to several reasons. Firstly, failures could potentially  
295 stem from the quality of gDNA, despite the DNA quality checks (QC) performed prior to accepting a sample for  
296 testing. Further QC that involves specific quantification of double-stranded non-fragmented DNA and traces of other  
297 interfering materials like RNA, carryover carbohydrate, residual phenol, guanidine or other reagents could enhance  
298 the call rate<sup>32</sup>. Regardless, the overall higher variant call rates on Nala PGx Core™ panel demonstrate high tolerance  
299 of interfering substances, therefore alluding to the high robustness of the assay. Often, failures at variant genotyping  
300 subsequently contribute to failures at determining diplotype, since an incomplete variant panel cannot translate into  
301 a diplotype. Failures at diplotype calling could also arise from a combination of variants that do not map onto a  
302 distinct diplotype, per the reference database, potentially indicating a novel combination.

303  
304 We further sought to evaluate the allele frequency distribution in the study cohort across the 5 major ethnic groups  
305 observed (Indonesian, Chinese, Malay, Indian and Caucasian). The data presented was limited strictly to the  
306 geographical boundaries of Singapore and Indonesia, which could account for the difference in allele frequencies  
307 observed in comparison to PharmGKB, which is representative of a more expansive and global cohort<sup>33</sup>. Whilst  
308 dissimilar to database figures, our study demonstrated the distributions for the following to be concordant with  
309 previous studies<sup>7,34,35</sup>, suggesting a niche in the PGx landscape of Singapore and Indonesia –

- 310 1. *CYP2C9*\*3 allele as the more common variant within Indians than *CYP2C9*\*2<sup>7</sup>
- 311 2. A *SLCO1B1* rs4149056 frequency of 12.5% amongst Indonesians<sup>34</sup>
- 312 3. High frequencies of the *CYP2D6*\*10 amongst Indonesians<sup>34</sup>
- 313 4. High frequencies of the *CYP2D6*\*36 allele as seen in the Indonesian, Chinese and Malay ethnicities<sup>35</sup>
- 314 5. Two functional copies of *CYP2D6* within our Chinese population<sup>35</sup>

315 Due to the lack of *CYP2D6* copy number references<sup>34</sup>, it is our understanding that the frequency of *CYP2D6*\*36 in  
316 Indonesia may not be well-represented. Our study revealed that the prevalence of *CYP2D6*\*36 to be approximately  
317 seventeen times higher amongst Indonesians as compared to the corresponding East Asian allele frequency on  
318 PharmGKB<sup>36</sup>. Furthermore, our study provides insight on the frequency of the *CYP2D6* \*10/\*36 diplotype in the  
319 archipelago, which may help inform the adoption of population-specific PGx workflows in the region. Taken  
320 together, the data presents a case for extending tailored PGx testing across the 4 pharmacogenes studied, *CYP2C9*,  
321 *CYP2C19*, *CYP2D6* and *SLCO1B1*, in South East Asia.

## 322 **Limitations**

323 The single largest reason for the diplotype-level discordance observed between Nala PGx Core™ and the Agena  
324 VeriDose® Core and *CYP2D6* CNV Panel appears to be a difference in the technological offerings and hence, allele

325 coverage of each panel. From Supplementary Table 7, out of the 28 instances of discordance observed, 9 instances  
326 were attributed to this cause (32.1%). This included two alleles each in *CYP2C9*, *CYP2C19* and *CYP2D6*.

327  
328 The variants *CYP2C9\*12*, *CYP2C9\*13*, *CYP2C19\*4A*, *CYP2C19\*6* and *CYP2D6\*13* were covered by Agena  
329 VeriDose® Core but not by Nala PGx Core™. Due to lack of coverage for these alleles, the genotypes identified by  
330 Nala PGx Core™ were inconsistent with the calls produced by Agena VeriDose® Core. It is important to note that  
331 Nala PGx Core™ was curated specifically to include alleles that were relevant to Asian and European populations,  
332 with a Minor Allele Frequency (MAF) >1% based on PharmGKB database for East Asians, South Asians and  
333 Europeans<sup>36</sup>. Similarly, *CYP2D6\*35*, an allele present in 5.5% of Europeans and 1.2% of South Asians, was  
334 identified by Nala PGx Core™ but not by Agena VeriDose® Core. The technological differences and subsequent  
335 inconsistencies in reporting suggest the need for further review from a product development standpoint.

336  
337 For the highly polymorphic *CYP2D6* gene, Nala PGx Core™ was designed to only cover the variant alleles listed in  
338 Table 1, that could lead to overestimation of \*1 allele in our population. This means star alleles that may be present  
339 in the population were identified as normal genotype, which could result in overestimation of \*1 allele in our  
340 population as compared to the PharmGKB's reported frequency (Supplementary Table 4).

341  
342 The study also relied on self-reported ethnicity, which may have contributed to racial bias in summarizing the  
343 observed allele and diplotype frequencies per ethnic group. Future studies may consider screening the ethnicities of  
344 participants as well as their next-of-kin, up to two generations prior<sup>10</sup>, to improve classification accuracy.

345  
346 Finally, the study cohort consisted of 246 individuals, with each ethnic group consisting of approximately 24 to 75  
347 individuals for the frequency analysis. Larger scale studies may be conducted to ensure that the trends observed as  
348 part of this study may be generalized across the populations examined.

## 349 **Future Work**

350 Further investigation is required for the remaining samples that had discrepant genotypes across platforms. Nala  
351 PGx Core™ was designed as a qPCR platform and genotyping was accompanied by Nala CDS™ that utilized  
352 quantitative thresholds. There could be cases of samples displaying borderline or ambiguous qPCR amplification  
353 curves and Ct-values, which could be misinterpreted by these thresholds. The benchmark platforms, Agena  
354 VeriDose® Core and *CYP2D6* CNV Panel and TaqMan® DME Genotyping Assays, were also analyzed by their  
355 accompanying software packages. Such ambiguous cases on either platform could lead to instances of discordance  
356 and sequencing of the region of interest may be required to ascertain the truth. For gene variants caused by SNPs  
357 and indels, the qPCR amplified product can be submitted for genome sequencing<sup>13</sup>. In the investigation of copy  
358 number variants, a two-step approach can be adopted<sup>37</sup>. Firstly, CNV calls observed in this study may be checked  
359 against an alternative benchmark such as digital droplet PCR (ddPCR)<sup>38</sup>. Secondly, where discordance in CNV  
360 calling persists, methods such as XL-PCR can be adopted to identify the presence of *CYP2D6/CYP2D7* hybrid

361 states, with submitting samples for whole-genome sequencing<sup>37</sup> being an option. Investigation of copy number  
362 variants may require amplification of region spanning across the gene of interest.

### 363 **Conflict of Interest**

364 A.S.K., M.T., J.P., J.T., C.M., G., J.S.H., and A.I. are employees of Nalagenetics Pte Ltd. A.I. has financial holdings  
365 in Nalagenetics Pte Ltd. Nalagenetics Pte Ltd and PT Nalagenetik Riset Indonesia are the license holders of Nala  
366 PGx Core™.

### 367 **Funding**

368 All expenses for this study were funded by Nalagenetics Pte Ltd and PT Nalagenetik Riset Indonesia.

### 370 **Data Availability Statement**

371 The data that supports the findings of this study are available as supplementary materials. Any additional data is  
372 available from the corresponding author upon reasonable request.

### 373 **References**

- 374 1. Berm EJJ, Loeff M de, Wilffert B, et al. Economic Evaluations of Pharmacogenetic and Pharmacogenomic  
375 Screening Tests: A Systematic Review. Second Update of the Literature. Bruns H, ed. *PLoS One*.  
376 2016;11(1):e0146262. doi:10.1371/journal.pone.0146262
- 377 2. Chan SL, Ang X, Sani LL, et al. Prevalence and characteristics of adverse drug reactions at admission to  
378 hospital: a prospective observational study. *Br J Clin Pharmacol*. 2016;82(6):1636-1646.  
379 doi:10.1111/bcp.13081
- 380 3. Sultana J, Cutroneo P, Trifirò G. Clinical and economic burden of adverse drug reactions. *J Pharmacol*  
381 *Pharmacother*. 2013;4(SUPPL.1). doi:10.4103/0976-500X.120957
- 382 4. Zhu Y, Lopes GS, Bielinski SJ, et al. Impact of Pharmacogenomic Information on Values of Care and  
383 Quality of Life Associated with Codeine and Tramadol-Related Adverse Drug Events. *Mayo Clin Proc*  
384 *Innov Qual Outcomes*. 2021;5(1):35-45. doi:10.1016/j.mayocpiqo.2020.08.009
- 385 5. Furge LL, Guengerich FP. Cytochrome P450 enzymes in drug metabolism and chemical toxicology: An  
386 introduction. *Biochem Mol Biol Educ*. 2006;34(2):66-74. doi:10.1002/bmb.2006.49403402066
- 387 6. Malsagova KA, Butkova T V, Kopylov AT, et al. Pharmacogenetic Testing: A Tool for Personalized Drug  
388 Therapy Optimization. *Pharmaceutics*. 2020;12(12):1-23. doi:10.3390/pharmaceutics12121240
- 389 7. Ling Goh L, Wei Lim C, Cheng Sim W, Xian Toh L, Pang Leong K. Analysis of Genetic Variation in  
390 CYP450 Genes for Clinical Implementation. Published online 2017. doi:10.1371/journal.pone.0169233
- 391 8. Kisor DF, Hoefer C, Decker BS. Pharmacogenomics and precision medicine. In: *Clinical Pharmacy*  
392 *Education, Practice and Research: Clinical Pharmacy, Drug Information, Pharmacovigilance,*  
393 *Pharmacoeconomics and Clinical Research*. Elsevier; 2018:437-451. doi:10.1016/B978-0-12-814276-  
394 9.00031-3
- 395 9. Ooi BNS, Raechell, Ying AF, et al. Robust Performance of Potentially Functional SNPs in Machine  
396 Learning Models for the Prediction of Atorvastatin-Induced Myalgia. *Front Pharmacol*. 2021;12:605764.  
397 doi:10.3389/fphar.2021.605764
- 398 10. Brunham LR, Chan SL, Li R, et al. Pharmacogenomic diversity in Singaporean populations and Europeans.  
399 *Pharmacogenomics J*. 2014;14(6):555-563. doi:10.1038/tpj.2014.22
- 400 11. Bachtiar M, Ooi BNS, Wang J, et al. Towards precision medicine: interrogating the human genome to  
401 identify drug pathways associated with potentially functional, population-differentiated polymorphisms.  
402 *Pharmacogenomics J*. 2019;19(6):516-527. doi:10.1038/s41397-019-0096-y

- 403 12. Perkel J. SNP genotyping: Six technologies that keyed a revolution. *Nat Methods*. 2008;5(5):447-453.  
404 doi:10.1038/nmeth0508-447
- 405 13. Yang W, Wu G, Broeckel U, et al. Comparison of genome sequencing and clinical genotyping for  
406 pharmacogenes. *Clin Pharmacol Ther*. 2016;100(4):380-388. doi:10.1002/cpt.411
- 407 14. S.A. Deepak, K.R. Kottapalli, R. Rakwal, et al. Real-Time PCR: Revolutionizing Detection and Expression  
408 Analysis of Genes. *Curr Genomics*. 2007;8(4):234-251. doi:10.2174/138920207781386960
- 409 15. Pratt VM, Zehnbauser B, Wilson JA, et al. Characterization of 107 genomic DNA reference materials for  
410 CYP2D6, CYP2C19, CYP2C9, VKORC1, and UGT1A1: A GeT-RM and association for molecular  
411 pathology collaborative project. *J Mol Diagnostics*. 2010;12(6):835-846. doi:10.2353/jmoldx.2010.100090
- 412 16. Pratt VM, Everts RE, Aggarwal P, et al. Characterization of 137 Genomic DNA Reference Materials for 28  
413 Pharmacogenetic Genes: A GeT-RM Collaborative Project. *J Mol Diagnostics*. 2016;18(1):109-123.  
414 doi:10.1016/j.jmoldx.2015.08.005
- 415 17. Syvänen AC. Accessing genetic variation: Genotyping single nucleotide polymorphisms. *Nat Rev Genet*.  
416 2001;2(12):930-942. doi:10.1038/35103535
- 417 18. Suo W, Shi X, Xu S, Li X, Lin Y. Towards low cost, multiplex clinical genotyping: 4-fluorescent  
418 Kompetitive Allele-Specific PCR and its application on pharmacogenetics. Kalendar R, ed. *PLoS One*.  
419 2020;15(3):e0230445. doi:10.1371/journal.pone.0230445
- 420 19. Shen GQ, Abdullah KG, Wang QK. The TaqMan method for SNP genotyping. *Methods Mol Biol*.  
421 2009;578:293-306. doi:10.1007/978-1-60327-411-1\_19
- 422 20. Davis BH, DeFrank G, Limdi NA, Harada S. Validation of the Spartan RX CYP2C19 Genotyping Assay  
423 Utilizing Blood Samples. *Clin Transl Sci*. 2020;13(2):260-264. doi:10.1111/cts.12714
- 424 21. Zhou Y, Armstead AR, Coshatt GM, Limdi NA, Harada S. Comparison of two point-of-care cyp2c19  
425 genotyping assays for genotype-guided antiplatelet therapy. *Ann Clin Lab Sci*. 2017;47(6):738-743.
- 426 22. Bergmeijer TO, Vos GJ, Claassens DM, et al. Feasibility and implementation of CYP2C19 genotyping in  
427 patients using antiplatelet therapy. *Pharmacogenomics*. 2018;19(7):621-628. doi:10.2217/pgs-2018-0013
- 428 23. Chae H, Kim M, Koh Y-S, et al. Feasibility of a Microarray-Based Point-of-Care CYP2C19 Genotyping  
429 Test for Predicting Clopidogrel On-Treatment Platelet Reactivity. *Biomed Res Int*. 2013;2013:1-5.  
430 doi:10.1155/2013/154073
- 431 24. Lee CC, McMillin GA, Babic N, Melis R, Yeo K-TJ. Evaluation of a CYP2C19 genotype panel on the  
432 GenMark eSensor® platform and the comparison to the Autogenomics Infiniti™ and Luminex CYP2C19  
433 panels. *Clin Chim Acta*. 2011;412(11-12):1133-1137. doi:10.1016/j.cca.2011.03.001
- 434 25. Vanwong N, Ngamsamut N, Hongkaew Y, et al. Detection of CYP2D6 polymorphism using Luminex  
435 xTAG technology in autism spectrum disorder: CYP2D6 activity score and its association with risperidone  
436 levels. *Drug Metab Pharmacokinet*. 2016;31(2):156-162. doi:10.1016/j.dmpk.2016.01.005
- 437 26. Lois A, Everts RE, Nakorchevsky A, et al. The VeriDose Core Panel: Strong Performance When Analyzing  
438 Challenging Pharmacogenetic Samples. Accessed April 2, 2021. [https://agenabio.com/wp-](https://agenabio.com/wp-content/uploads/2020/06/Agena-Conference-Poster-Veridose-Core-V3-G020.pdf)  
439 [content/uploads/2020/06/Agena-Conference-Poster-Veridose-Core-V3-G020.pdf](https://agenabio.com/wp-content/uploads/2020/06/Agena-Conference-Poster-Veridose-Core-V3-G020.pdf)
- 440 27. Gaedigk A, Turner A, Everts RE, et al. Characterization of Reference Materials for Genetic Testing of  
441 CYP2D6 Alleles. *J Mol Diagnostics*. 2019;21(6):1034-1052. doi:10.1016/j.jmoldx.2019.06.007
- 442 28. Technologies L. *TaqMan® SNP Genotyping Assays*, *TaqMan® Predesigned SNP Genotyping Assays*,  
443 *TaqMan® Custom SNP Genotyping Assays*, and *TaqMan® Drug Metabolism Enzyme Genotyping Assays*.;  
444 2014.
- 445 29. Population Genetics and the Hardy-Weinberg Principle. Accessed May 2, 2021.  
446 <https://www.cs.cmu.edu/~genetics/units/instructions/instructions-PGE.pdf>
- 447 30. Allele frequency. Accessed May 2, 2021. <https://www.nature.com/scitable/definition/allele-frequency-298/>
- 448 31. Calculating Inter- and Intra-Assay Coefficients of Variability. Accessed May 1, 2021.  
449 <https://salimetrics.com/calculating-inter-and-intra-assay-coefficients-of-variability/>
- 450 32. Matlock B. Assessment of Nucleic Acid Purity. *Tech Bull NanoDrop Spectrophotometers*. Published online  
451 2015:1-2.
- 452 33. Huddart R, Fohner AE, Whirl Carrillo M, et al. Standardized Biogeographic Grouping System for  
453 Annotating Populations in Pharmacogenetic Research. *Clin Pharmacol Ther*. 2019;105(5):1256-1262.  
454 doi:10.1002/cpt.1322
- 455 34. Runcharoen C, Fukunaga K, Sensorn I, et al. Prevalence of pharmacogenomic variants in 100  
456 pharmacogenes among Southeast Asian populations under the collaboration of the Southeast Asian  
457 Pharmacogenomics Research Network (SEAPharm). *Hum Genome Var*. 2021;8(1):7. doi:10.1038/s41439-  
458 021-00135-z

- 459 35. Chan W, Li MS, Sundaram SK, Tomlinson B, Cheung PY, Tzang CH. CYP2D6 allele frequencies, copy  
460 number variants, and tandems in the population of Hong Kong. *J Clin Lab Anal.* 2019;33(1).  
461 doi:10.1002/jcla.22634
- 462 36. Whirl-Carrillo M, McDonagh EM, Hebert JM, et al. Pharmacogenomics Knowledge for Personalized  
463 Medicine. *Clin Pharmacol Ther.* 2012;92(4):414-417. doi:10.1038/clpt.2012.96
- 464 37. Pös O, Radvanszky J, Styk J, et al. Copy Number Variation: Methods and Clinical Applications. *Appl Sci.*  
465 2021;11(2):819. doi:10.3390/app11020819
- 466 38. Gross AM, Ajay SS, Rajan V, et al. Copy-number variants in clinical genome sequencing: deployment and  
467 interpretation for rare and undiagnosed disease. *Genet Med.* 2019;21(5):1121-1130. doi:10.1038/s41436-  
468 018-0295-y  
469
- 470

471 **Tables**

472 **Table 1** Genes and variants evaluated

| Gene           | Star Allele     | Variant              | Nucleotide Changes      | Effect On Protein     | Allele Clinical Function Status | Genotyping Methods Utilized |                                           |                               |
|----------------|-----------------|----------------------|-------------------------|-----------------------|---------------------------------|-----------------------------|-------------------------------------------|-------------------------------|
|                |                 |                      |                         |                       |                                 | Nala PGx Core™              | Agena VeriDose® Core and CYP2D6 CNV Panel | TaqMan® DME Genotyping Assays |
| <i>CYP2C9</i>  | *2              | rs1799853            | 3608C>T                 | R144C                 | Decreased                       | Bi-allelic Assay            | VeriDose Core                             |                               |
|                | *3              | rs1057910            | 42614A>C                | I359L                 | None                            | Bi-allelic Assay            | VeriDose Core                             |                               |
| <i>CYP2C19</i> | *2              | rs4244285            | 19154G>A                | Splicing Defect       | None                            | Bi-allelic Assay            | VeriDose Core                             |                               |
|                | *3              | rs4986893            | 17948G>A                | W212X                 | None                            | Bi-allelic Assay            | VeriDose Core                             |                               |
|                | *17             | rs12248560           | -806C>T                 | 5' Region             | Increased                       | Bi-allelic Assay            | VeriDose Core                             |                               |
| <i>CYP2D6</i>  | *2              | rs1135840            | 4181G>C                 | S486T                 | Normal                          | Bi-allelic Assay            | VeriDose Core                             |                               |
|                | *2              | rs16947              | 2851C>T                 | R296C                 | Normal                          | Bi-allelic Assay            | VeriDose Core                             |                               |
|                | *3              | rs35742686           | 2550delA                | Frameshift            | None                            | Bi-allelic Assay            | VeriDose Core                             |                               |
|                | *4              | rs3892097, rs1065852 | 1847G>A, 100C>T         | Splicing Defect, P34S | None                            | Bi-allelic Assay            | VeriDose Core                             |                               |
|                | *5              | N/A                  | N/A                     | Gene Deletion         | None                            | CNV Assay (Intron 2)        | CYP2D6 CNV                                |                               |
|                | *6              | rs5030655            | 1708delT                | Frameshift            | None                            | Bi-allelic Assay            | VeriDose Core                             |                               |
|                | *8              | rs5030865            | 1759G>T                 | G169X                 | None                            | Tri-allelic Assay           | VeriDose Core                             |                               |
|                | *9              | rs5030656            | 2616delAAG              | K281del               | Decreased                       | Bi-allelic Assay            | VeriDose Core                             |                               |
|                | *10             | rs3892097, rs1065852 | 1847G>A, 100C>T         | Splicing Defect, P34S | Decreased                       | Bi-allelic Assay            | VeriDose Core                             |                               |
|                | *14             | rs5030865            | 1759G>A                 | G169R                 | Decreased                       | Tri-allelic Assay           | VeriDose Core                             |                               |
|                | *21             | rs72549352           | 2580_2581ins C          | Frameshift            | None                            | Bi-allelic Assay            | VeriDose Core                             |                               |
|                | *29             | rs59421388           | 3184G>A                 | V338M                 | Decreased                       | Bi-allelic Assay            | VeriDose Core                             |                               |
|                | *31             | rs267608319          | 4043G>A                 | R440H                 | None                            | Bi-allelic Assay            | NA                                        | AH21B9N                       |
|                | *35             | rs769258             | 31G>A                   | V11M                  | Normal                          | Bi-allelic Assay            | NA                                        | C__27102444_F0                |
|                | *36             | N/A                  | Recombination at Exon 9 | CYP2D6-2D7 Hybrid     | None                            | CNV Assay (Exon 9)          | CYP2D6 CNV                                |                               |
| *41            | rs28371725      | 2989G>A              | Splicing Defect         | Decreased             | Bi-allelic Assay                | VeriDose Core               |                                           |                               |
| <i>SLCO1B1</i> | NA <sup>†</sup> | rs4149056            | g.52422T>C              | V174A                 | Decreased                       | Bi-allelic Assay            | VeriDose Core                             |                               |

<sup>†</sup>Nala PGx Core™ detects the variant, rs4149056, which is associated with decreased enzymatic activity and is present in three known *SLCO1B1* haplotypes namely, *SLCO1B1*\*5, *SLCO1B1*\*15 and *SLCO1B1*\*17.

473  
474  
475



476 **Table 2** Observed genotype-level call rates per variant per gene per platform

| Gene           | Variant            | Variant Call Rate, % (n=246) |                                           |                               |
|----------------|--------------------|------------------------------|-------------------------------------------|-------------------------------|
|                |                    | Nala PGx Core™               | Agena VeriDose® Core and CYP2D6 CNV Panel | TaqMan® DME Genotyping Assays |
| <i>CYP2C9</i>  | rs1799853          | 100.0                        | 99.2                                      | NA                            |
|                | rs1057910          | 100.0                        | 99.6                                      | NA                            |
| <i>CYP2C19</i> | rs4244285          | 100.0                        | 99.6                                      | NA                            |
|                | rs4986893          | 100.0                        | 99.6                                      | NA                            |
|                | rs12248560         | 100.0                        | 98.8                                      | NA                            |
| <i>CYP2D6</i>  | rs1065852          | 98.4                         | 95.9                                      | NA                            |
|                | rs5030655          | 100.0                        | 99.2                                      | NA                            |
|                | rs3892097          | 98.8                         | 99.2                                      | NA                            |
|                | rs35742686         | 100.0                        | 98.8                                      | NA                            |
|                | rs16947            | 100.0                        | 99.6                                      | NA                            |
|                | rs28371725         | 100.0                        | 99.2                                      | NA                            |
|                | rs1135840          | 100.0                        | 99.6                                      | NA                            |
|                | rs769258           | 98.8                         | NA                                        | 100.0                         |
|                | rs5030865          | 97.2                         | 99.2                                      | NA                            |
|                | rs5030656          | 100.0                        | 99.6                                      | NA                            |
|                | rs59421388         | 100.0                        | 99.2                                      | NA                            |
|                | rs267608319        | 99.6                         | NA                                        | 100.0                         |
|                |                    | CNV Assay (Intron 2)         | 99.6                                      | 99.2                          |
|                | CNV Assay (Exon 9) | 99.6                         | 99.2                                      | NA                            |
| <i>SLCO1B1</i> | rs4149056          | 100.0                        | 99.2                                      | NA                            |

477  
478 **Table 3** Observed diplotype-level call rates per gene per platform

| Gene           | Diplotype Call Rate, % (n=246) |                                           |
|----------------|--------------------------------|-------------------------------------------|
|                | Nala PGx Core™                 | Agena VeriDose® Core and CYP2D6 CNV Panel |
| <i>CYP2C9</i>  | 100.0                          | 97.2                                      |
| <i>CYP2C19</i> | 100.0                          | 98.8                                      |
| <i>CYP2D6</i>  | 95.9                           | 90.7                                      |

479  
480 **Table 4** Intra-precision and inter-precision concordance rates

| Gene           | Variant    | Concordance rate, %                         |                                                   |
|----------------|------------|---------------------------------------------|---------------------------------------------------|
|                |            | Intra-precision<br>(47 tests in triplicate) | Inter-precision<br>(120 tests across 4 variables) |
| <i>CYP2C9</i>  | rs1799853  | 100%                                        | 100%                                              |
|                | rs1057910  | 100%                                        | 100%                                              |
| <i>CYP2C19</i> | rs4244285  | 100%                                        | 100%                                              |
|                | rs4986893  | 100%                                        | 100%                                              |
|                | rs12248560 | 100%                                        | 100%                                              |
| <i>CYP2D6</i>  | rs1065852  | 100%                                        | 100%                                              |
|                | rs5030655  | 100%                                        | 100%                                              |
|                | rs3892097  | 100%                                        | 100%                                              |
|                | rs35742686 | 100%                                        | 100%                                              |

|                |             |      |      |
|----------------|-------------|------|------|
|                | rs16947     | 100% | 100% |
|                | rs28371725  | 100% | 100% |
|                | rs1135840   | 100% | 100% |
|                | rs769258    | 100% | 100% |
|                | rs5030865   | 100% | 100% |
|                | rs5030656   | 100% | 100% |
|                | rs59421388  | 100% | 100% |
|                | rs267608319 | 100% | 100% |
| <i>SLCO1B1</i> | rs4149056   | 100% | 100% |

481  
482

**Table 5** Intra-precision and inter-precision for *CYP2D6* Copy Number

| Sample | Variant  | Average Copy Number | Sample Size, n | Coefficient of Variation |                 |
|--------|----------|---------------------|----------------|--------------------------|-----------------|
|        |          |                     |                | Intra-precision          | Inter-precision |
| 221374 | Intron 2 | 2                   | 11             | 4%                       | 6%              |
|        | Exon 9   | 1                   |                | 5%                       | 5%              |
| 222660 | Intron 2 | 2                   | 9              | 3%                       | 5%              |
|        | Exon 9   | 2                   |                | 4%                       | 6%              |
| 222769 | Intron 2 | 3                   | 22             | 4%                       | 10%             |
|        | Exon 9   | 2                   |                | 6%                       | 13%             |

483  
484

**Table 6** Genotype concordance for genes *CYP2C9*, *CYP2C19*, *CYP2D6* and *SLCO1B1*

| Gene           | Variant               | Genotype  | Sample Size Per Genotype <sup>†</sup> | Concordance to Benchmark, % <sup>‡</sup> | Discordant Calls By Nala PGx Core™ <sup>§</sup> |
|----------------|-----------------------|-----------|---------------------------------------|------------------------------------------|-------------------------------------------------|
| <i>CYP2C9</i>  | rs1799853<br>N = 225  | C/C       | 212                                   | 100.0                                    | 0                                               |
|                |                       | C/T       | 13                                    |                                          | 0                                               |
|                |                       | T/T       | 0                                     |                                          | 0                                               |
|                | rs1057910<br>N = 225  | A/A       | 204                                   | 100.0                                    | 0                                               |
|                |                       | A/C       | 21                                    |                                          | 0                                               |
|                |                       | C/C       | 0                                     |                                          | 0                                               |
| <i>CYP2C19</i> | rs4244285<br>N = 225  | G/G       | 121                                   | 96.9                                     | 1                                               |
|                |                       | A/G       | 89                                    |                                          | 2                                               |
|                |                       | A/A       | 15                                    |                                          | 4                                               |
|                | rs4986893<br>N = 225  | G/G       | 206                                   | 98.7                                     | 2                                               |
|                |                       | A/G       | 19                                    |                                          | 1                                               |
|                |                       | A/A       | 0                                     |                                          | 0                                               |
|                | rs12248560<br>N = 225 | C/C       | 0                                     | 100.0                                    | 0                                               |
|                |                       | C/T       | 0                                     |                                          | 0                                               |
|                |                       | T/T       | 0                                     |                                          | 0                                               |
| <i>CYP2D6</i>  | rs1065852<br>N = 225  | G/G       | 77                                    | 99.6                                     | 0                                               |
|                |                       | A/G       | 76                                    |                                          | 1                                               |
|                |                       | A/A       | 72                                    |                                          | 0                                               |
|                | rs5030655<br>N = 225  | A/A       | 224                                   | 100.0                                    | 0                                               |
|                |                       | delA/A    | 1                                     |                                          | 0                                               |
|                |                       | delA/delA | 0                                     |                                          | 0                                               |
|                | rs3892097<br>N = 225  | C/C       | 205                                   | 100.0                                    | 0                                               |
|                |                       | C/T       | 16                                    |                                          | 0                                               |
|                |                       | T/T       | 4                                     |                                          | 0                                               |
|                | rs35742686<br>N = 225 | T/T       | 225                                   | 100.0                                    | 0                                               |
|                |                       | delT/T    | 0                                     |                                          | 0                                               |
|                |                       | delT/delT | 0                                     |                                          | 0                                               |
|                | rs16947<br>N = 225    | G/G       | 145                                   | 96.9                                     | 2                                               |
|                |                       | A/G       | 64                                    |                                          | 4                                               |
|                |                       | A/A       | 16                                    |                                          | 1                                               |
|                | rs28371725<br>N = 225 | C/C       | 204                                   | 100.0                                    | 0                                               |
|                |                       | C/T       | 19                                    |                                          | 0                                               |
|                |                       | T/T       | 2                                     |                                          | 0                                               |
|                | rs1135840             | C/C       | 33                                    | 97.8                                     | 1                                               |

|                           |                               |               |      |       |   |
|---------------------------|-------------------------------|---------------|------|-------|---|
|                           | N = 225                       | C/G           | 68   | 100.0 | 1 |
|                           |                               | G/G           | 124  |       | 3 |
|                           | <b>rs769258</b><br>N = 225    | C/C           | 220  | 99.6  | 0 |
|                           |                               | C/T           | 5    |       | 0 |
|                           |                               | T/T           | 0    |       | 0 |
|                           | <b>rs5030865</b><br>N = 225   | C/C           | 222  | 100.0 | 0 |
|                           |                               | C/T           | 3    |       | 1 |
|                           |                               | T/T           | 0    |       | 0 |
|                           | <b>rs5030656</b><br>N = 225   | CT/CTT        | 224  | 100.0 | 0 |
|                           |                               | delCTT/CTT    | 1    |       | 0 |
|                           |                               | delCTT/delCTT | 0    |       | 0 |
|                           | <b>rs59421388</b><br>N = 225  | C/C           | 224  | 100.0 | 0 |
|                           |                               | C/T           | 1    |       | 0 |
|                           |                               | T/T           | 0    |       | 0 |
|                           | <b>rs267608319</b><br>N = 225 | C/C           | 225  | 100.0 | 0 |
| C/T                       |                               | 0             | 0    |       |   |
| T/T                       |                               | 0             | 0    |       |   |
| <b>SLCO1B1</b><br>N = 225 | T/T                           | 182           | 97.3 | 2     |   |
|                           | C/T                           | 42            |      | 4     |   |
|                           | C/C                           | 1             |      | 0     |   |

<sup>†</sup>“Sample Size Per Genotype” reflects the counts of each genotype as produced by the benchmark, and not by Nala PGx Core™.

<sup>‡</sup>Refer to Table 1 for an outline of the benchmark methods used per variant.

<sup>§</sup>Discordant calls refer to instances in which Nala PGx Core™ did not produce a genotype call concordant with the benchmark.

485

486

**Table 7** Genotype concordance for *CYP2D6* Intron 2 And Exon 9 Copy Number Variations

| Gene          | Variant                    | Copy Number | Sample Size Per Copy Number <sup>†</sup> | Concordance to Benchmark, % <sup>‡</sup> | Discordant Calls By Nala PGx Core™ <sup>§</sup> |
|---------------|----------------------------|-------------|------------------------------------------|------------------------------------------|-------------------------------------------------|
| <i>CYP2D6</i> | <b>Intron 2</b><br>N = 224 | 0           | 0                                        | 99.6                                     | 0                                               |
|               |                            | 1           | 12                                       |                                          | 0                                               |
|               |                            | 2           | 130                                      |                                          | 0                                               |
|               |                            | >=3         | 82                                       |                                          | 1                                               |
|               | <b>Exon 9</b><br>N = 224   | 0           | 0                                        | 98.7                                     | 0                                               |
|               |                            | 1           | 24                                       |                                          | 1                                               |
|               |                            | 2           | 193                                      |                                          | 2                                               |
|               |                            | >=3         | 7                                        | 0                                        |                                                 |

<sup>†</sup>“Sample Size Per Copy Number” reflects the counts of each copy number call as produced by the benchmark, and not by Nala PGx Core™.

<sup>‡</sup>Refer to Table 1 for an outline of the benchmark methods used per variant.

<sup>§</sup>Discordant calls refer to instances in which Nala PGx Core™ did not produce a copy number call concordant with the benchmark.

487

488

489

**Table 8** Diplotype concordance for *CYP2C9*, *CYP2C19* and *CYP2D6* between Nala PGx Core™, and Agena VeriDose® Core and *CYP2D6* CNV Panel

| Genes          | Concordance, % <sup>†</sup> | Discordant Diplotypes                            |                |           |
|----------------|-----------------------------|--------------------------------------------------|----------------|-----------|
|                |                             | Agena VeriDose® Core and <i>CYP2D6</i> CNV Panel | Nala PGx Core™ | Instances |
| <i>CYP2C9</i>  | 100% (n = 213)              | NA                                               | NA             | NA        |
| <i>CYP2C19</i> | 96.4% (n = 223)             | *1/*1                                            | *1/*3          | 1         |
|                |                             | *1/*2                                            | *1/*1          | 1         |
|                |                             | *1/*2                                            | *1/*3          | 1         |
|                |                             | *1/*3                                            | *2/*2          | 1         |
|                |                             | *2/*2                                            | *1/*1          | 2         |
|                |                             | *2/*2                                            | *1/*2          | 2         |
| <i>CYP2D6</i>  | 94.7% (n = 209)             | *1/*1                                            | *2/*2          | 1         |
|                |                             | *1/*10                                           | *1/*10, CN >=3 | 1         |
|                |                             | *1/*41                                           | *39/*41        | 1         |
|                |                             | *2/*2                                            | *1/*1          | 1         |

|  |  |                    |                |   |
|--|--|--------------------|----------------|---|
|  |  | *2/*10             | *1/*10         | 1 |
|  |  | *2/*36, CN >=3     | *2/*10, CN >=3 | 1 |
|  |  | *4/*36             | *4/*10         | 2 |
|  |  | *10/*36            | *2/*36         | 1 |
|  |  | *13 *1/*10         | *1/*10, CN >=3 | 1 |
|  |  | *13 *1/*41, CN = 1 | *1/*41         | 1 |

<sup>†</sup>The concordance presented in this table excludes samples that have mismatches in diplotype calls arising from technological differences between platforms. Please refer to Supplementary Table 7 for a detailed breakdown of all diplotypes detected.

490  
491

**Table 9** Observed allele frequencies by ethnicity

| Gene                        | Allele or Variant      | Allele Frequencies (Per This Study) |         |       |        |           |         | Allele Frequencies (PharmGKB) |                     |                    |
|-----------------------------|------------------------|-------------------------------------|---------|-------|--------|-----------|---------|-------------------------------|---------------------|--------------------|
|                             |                        | Indonesian                          | Chinese | Malay | Indian | Caucasian | Overall | East Asian                    | Central/South Asian | European           |
| <i>CYP2C9</i><br>(n = 206)  | *2                     | 0.000                               | 0.000   | 0.000 | 0.060  | 0.172     | 0.032   | 0.002                         | 0.114               | 0.127              |
|                             | *3                     | 0.000                               | 0.040   | 0.039 | 0.100  | 0.069     | 0.044   | 0.038                         | 0.110               | 0.076              |
| <i>CYP2C19</i><br>(n = 201) | *2                     | 0.297                               | 0.274   | 0.289 | 0.229  | 0.138     | 0.256   | 0.284                         | 0.270               | 0.147              |
|                             | *3                     | 0.041                               | 0.055   | 0.066 | 0.000  | 0.017     | 0.042   | 0.072                         | 0.016               | 0.002              |
|                             | *17                    | 0.054                               | 0.007   | 0.039 | 0.229  | 0.138     | 0.067   | 0.021                         | 0.171               | 0.216              |
| <i>CYP2D6</i><br>(n = 195)  | *2                     | 0.088                               | 0.118   | 0.167 | 0.140  | 0.196     | 0.136   | 0.121                         | 0.295               | 0.277              |
|                             | *4                     | 0.000                               | 0.035   | 0.069 | 0.020  | 0.161     | 0.051   | 0.005                         | 0.091               | 0.185              |
|                             | *5                     | 0.029                               | 0.028   | 0.028 | 0.080  | 0.000     | 0.031   | 0.049                         | 0.046               | 0.030              |
|                             | *6                     | 0.000                               | 0.000   | 0.000 | 0.000  | 0.018     | 0.003   | 0.000                         | 0.000               | 0.011              |
|                             | *9                     | 0.000                               | 0.000   | 0.000 | 0.000  | 0.018     | 0.003   | 0.002                         | 0.003               | 0.028              |
|                             | *10                    | 0.338                               | 0.299   | 0.222 | 0.160  | 0.143     | 0.251   | 0.436                         | 0.087               | 0.016              |
|                             | *14                    | 0.000                               | 0.014   | 0.000 | 0.000  | 0.000     | 0.005   | 0.003                         | ND                  | 0.000              |
|                             | *29                    | 0.000                               | 0.000   | 0.000 | 0.000  | 0.018     | 0.003   | 0.000                         | 0.003               | 0.001              |
| *36                         | 0.206                  | 0.250                               | 0.181   | 0.160 | 0.054  | 0.190     | 0.012   | 0.000                         | 0.000               |                    |
| *41                         | 0.044                  | 0.056                               | 0.028   | 0.040 | 0.071  | 0.049     | 0.023   | 0.123                         | 0.092               |                    |
| <i>SLCO1B1</i><br>(n = 203) | rs4149056 <sup>†</sup> | 0.125                               | 0.074   | 0.026 | 0.040  | 0.167     | 0.084   | 0.125 <sup>‡</sup>            | 0.050 <sup>‡</sup>  | 0.159 <sup>‡</sup> |

"ND" refers to instances in which no data is available for the given allele on PharmGKB.

<sup>†</sup>rs4149056 refers to the reduced function variant of *SLCO1B1* that is present in *SLCO1B1*\*5, *SLCO1B1*\*15 and *SLCO1B1*\*17.

<sup>‡</sup>Allele frequency values for rs4149056 have been obtained from gnomAD.

492  
493

**Table 10** Observed diplotype frequencies by ethnicity

| Gene           | Diplotype     | Phenotype <sup>‡</sup> | Diplotype Frequencies (Per This Study) <sup>†</sup> |       |         |       |       |       |        |       |           |       |         |       |
|----------------|---------------|------------------------|-----------------------------------------------------|-------|---------|-------|-------|-------|--------|-------|-----------|-------|---------|-------|
|                |               |                        | Indonesian                                          |       | Chinese |       | Malay |       | Indian |       | Caucasian |       | Overall |       |
|                |               |                        | Obs                                                 | Freq  | Obs     | Freq  | Obs   | Freq  | Obs    | Freq  | Obs       | Freq  | Obs     | Freq  |
| <i>CYP2C9</i>  | *1/*1         | NM                     | 39                                                  | 1.000 | 69      | 0.920 | 35    | 0.921 | 17     | 0.680 | 16        | 0.552 | 176     | 0.854 |
|                | *1/*2         | IM                     | 0                                                   | 0.000 | 0       | 0.000 | 0     | 0.000 | 3      | 0.120 | 9         | 0.310 | 12      | 0.058 |
|                | *1/*3         | IM                     | 0                                                   | 0.000 | 6       | 0.080 | 3     | 0.079 | 5      | 0.200 | 3         | 0.103 | 17      | 0.083 |
|                | *2/*3         | PM                     | 0                                                   | 0.000 | 0       | 0.000 | 0     | 0.000 | 0      | 0.000 | 1         | 0.034 | 1       | 0.005 |
| <i>CYP2C19</i> | *1/*1         | NM                     | 10                                                  | 0.270 | 31      | 0.425 | 14    | 0.368 | 8      | 0.333 | 14        | 0.483 | 77      | 0.383 |
|                | *1/*2         | IM                     | 19                                                  | 0.514 | 28      | 0.384 | 14    | 0.368 | 5      | 0.208 | 7         | 0.241 | 73      | 0.363 |
|                | *1/*3         | IM                     | 3                                                   | 0.081 | 6       | 0.082 | 3     | 0.079 | 0      | 0.000 | 1         | 0.034 | 13      | 0.065 |
|                | *1/*17        | RM                     | 3                                                   | 0.081 | 1       | 0.014 | 1     | 0.026 | 5      | 0.208 | 5         | 0.172 | 15      | 0.075 |
|                | *2/*2         | PM                     | 1                                                   | 0.027 | 5       | 0.068 | 3     | 0.079 | 1      | 0.042 | 0         | 0.000 | 10      | 0.050 |
|                | *2/*3         | PM                     | 0                                                   | 0.000 | 2       | 0.027 | 2     | 0.053 | 0      | 0.000 | 0         | 0.000 | 4       | 0.020 |
|                | *2/*17        | IM                     | 1                                                   | 0.027 | 0       | 0.000 | 0     | 0.000 | 4      | 0.167 | 1         | 0.034 | 6       | 0.030 |
|                | *17/*17       | UM                     | 0                                                   | 0.000 | 0       | 0.000 | 1     | 0.026 | 1      | 0.042 | 1         | 0.034 | 3       | 0.015 |
| <i>CYP2D6</i>  | *1/*1         | NM                     | 6                                                   | 0.176 | 7       | 0.097 | 5     | 0.139 | 4      | 0.160 | 2         | 0.071 | 24      | 0.123 |
|                | *1/*2         | NM                     | 0                                                   | 0.000 | 2       | 0.028 | 2     | 0.056 | 3      | 0.120 | 3         | 0.107 | 10      | 0.051 |
|                | *1/*2, CN >=3 | UM                     | 0                                                   | 0.000 | 0       | 0.000 | 0     | 0.000 | 1      | 0.040 | 1         | 0.036 | 2       | 0.010 |
|                | *1/*4         | IM                     | 0                                                   | 0.000 | 2       | 0.028 | 1     | 0.028 | 0      | 0.000 | 4         | 0.143 | 7       | 0.036 |
|                | *1/*5         | IM                     | 0                                                   | 0.000 | 2       | 0.028 | 1     | 0.028 | 1      | 0.040 | 0         | 0.000 | 4       | 0.021 |

|                 |    |   |       |    |       |   |       |   |       |   |       |    |       |
|-----------------|----|---|-------|----|-------|---|-------|---|-------|---|-------|----|-------|
| *1/*6           | IM | 0 | 0.000 | 0  | 0.000 | 0 | 0.000 | 0 | 0.000 | 1 | 0.036 | 1  | 0.005 |
| *1/*10          | NM | 4 | 0.118 | 3  | 0.042 | 2 | 0.056 | 2 | 0.080 | 2 | 0.071 | 13 | 0.067 |
| *1/*14          | NM | 0 | 0.000 | 1  | 0.014 | 0 | 0.000 | 0 | 0.000 | 0 | 0.000 | 1  | 0.005 |
| *1/*29          | NM | 0 | 0.000 | 0  | 0.000 | 0 | 0.000 | 0 | 0.000 | 1 | 0.036 | 1  | 0.005 |
| *1/*36          | IM | 3 | 0.088 | 3  | 0.042 | 5 | 0.139 | 4 | 0.160 | 0 | 0.000 | 15 | 0.077 |
| *1/*41          | NM | 1 | 0.029 | 2  | 0.028 | 1 | 0.028 | 0 | 0.000 | 2 | 0.071 | 6  | 0.031 |
| *1/*41, CN >=3  | UM | 0 | 0.000 | 0  | 0.000 | 0 | 0.000 | 1 | 0.040 | 0 | 0.000 | 1  | 0.005 |
| *2/*2           | NM | 0 | 0.000 | 1  | 0.014 | 1 | 0.028 | 1 | 0.040 | 1 | 0.036 | 4  | 0.021 |
| *2/*4           | IM | 0 | 0.000 | 0  | 0.000 | 1 | 0.028 | 0 | 0.000 | 2 | 0.071 | 3  | 0.015 |
| *2/*5           | IM | 0 | 0.000 | 0  | 0.000 | 1 | 0.028 | 1 | 0.040 | 0 | 0.000 | 2  | 0.010 |
| *2/*10          | NM | 4 | 0.118 | 4  | 0.056 | 4 | 0.111 | 0 | 0.000 | 1 | 0.036 | 13 | 0.067 |
| *2/*14          | NM | 0 | 0.000 | 1  | 0.014 | 0 | 0.000 | 0 | 0.000 | 0 | 0.000 | 1  | 0.005 |
| *2/*36          | IM | 2 | 0.059 | 4  | 0.056 | 2 | 0.056 | 0 | 0.000 | 1 | 0.036 | 9  | 0.046 |
| *2/*41          | NM | 0 | 0.000 | 4  | 0.056 | 0 | 0.000 | 0 | 0.000 | 1 | 0.036 | 5  | 0.026 |
| *4/*4           | PM | 0 | 0.000 | 1  | 0.014 | 1 | 0.028 | 0 | 0.000 | 1 | 0.036 | 3  | 0.015 |
| *4/*5           | PM | 0 | 0.000 | 0  | 0.000 | 0 | 0.000 | 1 | 0.040 | 0 | 0.000 | 1  | 0.005 |
| *4/*9           | IM | 0 | 0.000 | 0  | 0.000 | 0 | 0.000 | 0 | 0.000 | 1 | 0.036 | 1  | 0.005 |
| *4/*10          | IM | 0 | 0.000 | 1  | 0.014 | 1 | 0.028 | 0 | 0.000 | 0 | 0.000 | 2  | 0.010 |
| *5/*10          | IM | 0 | 0.000 | 2  | 0.028 | 0 | 0.000 | 1 | 0.040 | 0 | 0.000 | 3  | 0.015 |
| *5/*41          | IM | 2 | 0.059 | 0  | 0.000 | 0 | 0.000 | 0 | 0.000 | 0 | 0.000 | 2  | 0.010 |
| *10/*10         | IM | 3 | 0.088 | 1  | 0.014 | 2 | 0.056 | 0 | 0.000 | 2 | 0.071 | 8  | 0.041 |
| *10/*10, CN >=3 | IM | 0 | 0.000 | 1  | 0.014 | 0 | 0.000 | 0 | 0.000 | 0 | 0.000 | 1  | 0.005 |
| *10/*36         | IM | 9 | 0.265 | 28 | 0.389 | 5 | 0.139 | 4 | 0.160 | 1 | 0.036 | 47 | 0.241 |
| *10/*41         | IM | 0 | 0.000 | 1  | 0.014 | 0 | 0.000 | 1 | 0.040 | 0 | 0.000 | 2  | 0.010 |
| *36/*41         | IM | 0 | 0.000 | 1  | 0.014 | 1 | 0.028 | 0 | 0.000 | 1 | 0.036 | 3  | 0.015 |

<sup>†</sup>"Obs" and "Freq" are abbreviations for "Observations" and "Frequency" respectively.

<sup>‡</sup>"NM," "IM," "PM" and "UM" are abbreviations for "Normal Metabolizer," "Intermediate Metabolizer," "Poor Metabolizer" and "Ultrarapid Metabolizer" respectively.

## 494 Figure Legends

495 **Figure 1. CYP2D6\*36 Frequency By Ethnicity.** Distribution of individuals carrying one or two copies of the  
496 CYP2D6\*36 allele among the study cohort (n=205), grouped per ethnicity.

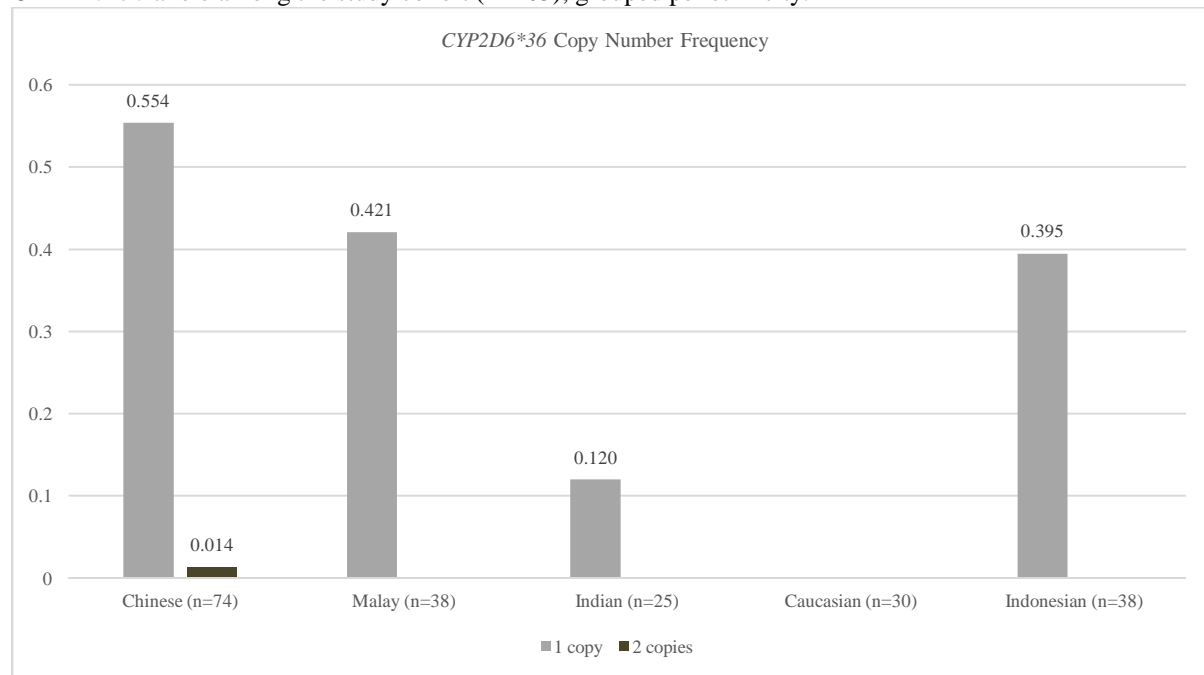

497  
498

499 **Supplementary Figure 1. Observed *CYP2D6* Functional Copy Number Frequencies By Ethnicity.** Distribution  
500 of individuals carrying one, two or three or more copies of the *CYP2D6* functional gene among the study cohort  
501 (n=205), grouped per ethnicity.

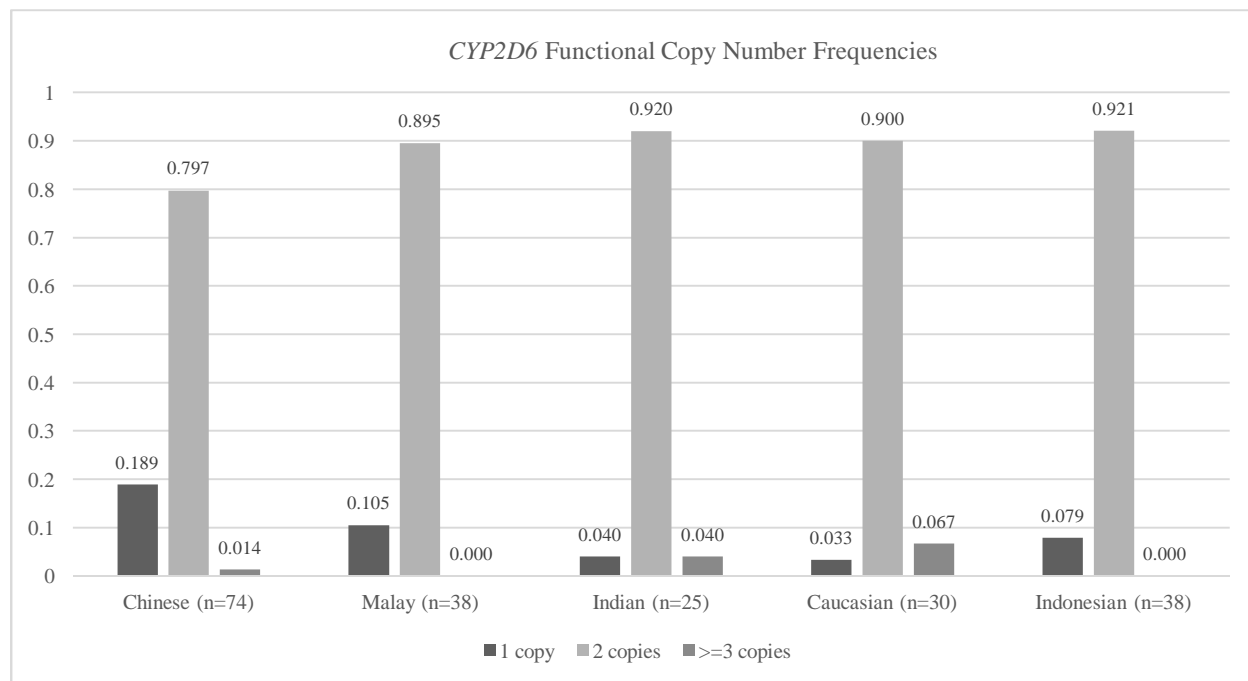

502

## Validation of a multi-gene qPCR-based pharmacogenomics panel across major ethnic groups in Singapore and Indonesia

### A. Main Tables and Figures

**Table 1** Genes and variants evaluated

| Gene           | Star Allele     | Variant              | Nucleotide Changes      | Effect On Protein     | Allele Clinical Function Status | Genotyping Methods Utilized |                                           |                               |
|----------------|-----------------|----------------------|-------------------------|-----------------------|---------------------------------|-----------------------------|-------------------------------------------|-------------------------------|
|                |                 |                      |                         |                       |                                 | Nala PGx Core™              | Agena VeriDose® Core and CYP2D6 CNV Panel | TaqMan® DME Genotyping Assays |
| <i>CYP2C9</i>  | *2              | rs1799853            | 3608C>T                 | R144C                 | Decreased                       | Bi-allelic Assay            | VeriDose Core                             |                               |
|                | *3              | rs1057910            | 42614A>C                | I359L                 | None                            | Bi-allelic Assay            | VeriDose Core                             |                               |
| <i>CYP2C19</i> | *2              | rs4244285            | 19154G>A                | Splicing Defect       | None                            | Bi-allelic Assay            | VeriDose Core                             |                               |
|                | *3              | rs4986893            | 17948G>A                | W212X                 | None                            | Bi-allelic Assay            | VeriDose Core                             |                               |
|                | *17             | rs12248560           | -806C>T                 | 5' Region             | Increased                       | Bi-allelic Assay            | VeriDose Core                             |                               |
| <i>CYP2D6</i>  | *2              | rs1135840            | 4181G>C                 | S486T                 | Normal                          | Bi-allelic Assay            | VeriDose Core                             |                               |
|                | *2              | rs16947              | 2851C>T                 | R296C                 | Normal                          | Bi-allelic Assay            | VeriDose Core                             |                               |
|                | *3              | rs35742686           | 2550delA                | Frameshift            | None                            | Bi-allelic Assay            | VeriDose Core                             |                               |
|                | *4              | rs3892097, rs1065852 | 1847G>A, 100C>T         | Splicing Defect, P34S | None                            | Bi-allelic Assay            | VeriDose Core                             |                               |
|                | *5              | N/A                  | N/A                     | Gene Deletion         | None                            | CNV Assay (Intron 2)        | CYP2D6 CNV                                |                               |
|                | *6              | rs5030655            | 1708delT                | Frameshift            | None                            | Bi-allelic Assay            | VeriDose Core                             |                               |
|                | *8              | rs5030865            | 1759G>T                 | G169X                 | None                            | Tri-allelic Assay           | VeriDose Core                             |                               |
|                | *9              | rs5030656            | 2616delAAG              | K281del               | Decreased                       | Bi-allelic Assay            | VeriDose Core                             |                               |
|                | *10             | rs3892097, rs1065852 | 1847G>A, 100C>T         | Splicing Defect, P34S | Decreased                       | Bi-allelic Assay            | VeriDose Core                             |                               |
|                | *14             | rs5030865            | 1759G>A                 | G169R                 | Decreased                       | Tri-allelic Assay           | VeriDose Core                             |                               |
|                | *21             | rs72549352           | 2580_2581insC           | Frameshift            | None                            | Bi-allelic Assay            | VeriDose Core                             |                               |
|                | *29             | rs59421388           | 3184G>A                 | V338M                 | Decreased                       | Bi-allelic Assay            | VeriDose Core                             |                               |
|                | *31             | rs267608319          | 4043G>A                 | R440H                 | None                            | Bi-allelic Assay            | NA                                        | AH21B9N                       |
|                | *35             | rs769258             | 31G>A                   | V11M                  | Normal                          | Bi-allelic Assay            | NA                                        | C__27102444_F0                |
|                | *36             | N/A                  | Recombination at Exon 9 | CYP2D6-2D7 Hybrid     | None                            | CNV Assay (Exon 9)          | CYP2D6 CNV                                |                               |
| *41            | rs28371725      | 2989G>A              | Splicing Defect         | Decreased             | Bi-allelic Assay                | VeriDose Core               |                                           |                               |
| <i>SLCO1B1</i> | NA <sup>†</sup> | rs4149056            | g.52422T>C              | V174A                 | Decreased                       | Bi-allelic Assay            | VeriDose Core                             |                               |

<sup>†</sup>Nala PGx Core™ detects the variant, rs4149056, which is associated with decreased enzymatic activity and is present in three known *SLCO1B1* haplotypes namely, *SLCO1B1*\*5, *SLCO1B1*\*15 and *SLCO1B1*\*17.

**Table 2** Observed genotype-level call rates per variant per gene per platform

| Gene           | Variant              | Variant Call Rate, % (n=246) |                                           |                               |
|----------------|----------------------|------------------------------|-------------------------------------------|-------------------------------|
|                |                      | Nala PGx Core™               | Agena VeriDose® Core and CYP2D6 CNV Panel | TaqMan® DME Genotyping Assays |
| <i>CYP2C9</i>  | rs1799853            | 100.0                        | 99.2                                      | NA                            |
|                | rs1057910            | 100.0                        | 99.6                                      | NA                            |
| <i>CYP2C19</i> | rs4244285            | 100.0                        | 99.6                                      | NA                            |
|                | rs4986893            | 100.0                        | 99.6                                      | NA                            |
| <i>CYP2D6</i>  | rs12248560           | 100.0                        | 98.8                                      | NA                            |
|                | rs1065852            | 98.4                         | 95.9                                      | NA                            |
|                | rs5030655            | 100.0                        | 99.2                                      | NA                            |
|                | rs3892097            | 98.8                         | 99.2                                      | NA                            |
|                | rs35742686           | 100.0                        | 98.8                                      | NA                            |
|                | rs16947              | 100.0                        | 99.6                                      | NA                            |
|                | rs28371725           | 100.0                        | 99.2                                      | NA                            |
|                | rs1135840            | 100.0                        | 99.6                                      | NA                            |
|                | rs769258             | 98.8                         | NA                                        | 100.0                         |
|                | rs5030865            | 97.2                         | 99.2                                      | NA                            |
|                | rs5030656            | 100.0                        | 99.6                                      | NA                            |
|                | rs59421388           | 100.0                        | 99.2                                      | NA                            |
|                | rs267608319          | 99.6                         | NA                                        | 100.0                         |
|                | CNV Assay (Intron 2) | 99.6                         | 99.2                                      | NA                            |
|                | CNV Assay (Exon 9)   | 99.6                         | 99.2                                      | NA                            |
| <i>SLCO1B1</i> | rs4149056            | 100.0                        | 99.2                                      | NA                            |

**Table 3** Observed diplotype-level call rates per gene per platform

| Gene           | Diplotype Call Rate, % (n=246) |                                           |
|----------------|--------------------------------|-------------------------------------------|
|                | Nala PGx Core™                 | Agena VeriDose® Core and CYP2D6 CNV Panel |
| <i>CYP2C9</i>  | 100.0                          | 97.2                                      |
| <i>CYP2C19</i> | 100.0                          | 98.8                                      |
| <i>CYP2D6</i>  | 95.9                           | 90.7                                      |



**Table 4** Intra-precision and inter-precision concordance rates

| Gene           | Variant     | Concordance rate, %                         |                                                   |
|----------------|-------------|---------------------------------------------|---------------------------------------------------|
|                |             | Intra-precision<br>(47 tests in triplicate) | Inter-precision<br>(120 tests across 4 variables) |
| <i>CYP2C9</i>  | rs1799853   | 100%                                        | 100%                                              |
|                | rs1057910   | 100%                                        | 100%                                              |
| <i>CYP2C19</i> | rs4244285   | 100%                                        | 100%                                              |
|                | rs4986893   | 100%                                        | 100%                                              |
|                | rs12248560  | 100%                                        | 100%                                              |
| <i>CYP2D6</i>  | rs1065852   | 100%                                        | 100%                                              |
|                | rs5030655   | 100%                                        | 100%                                              |
|                | rs3892097   | 100%                                        | 100%                                              |
|                | rs35742686  | 100%                                        | 100%                                              |
|                | rs16947     | 100%                                        | 100%                                              |
|                | rs28371725  | 100%                                        | 100%                                              |
|                | rs1135840   | 100%                                        | 100%                                              |
|                | rs769258    | 100%                                        | 100%                                              |
|                | rs5030865   | 100%                                        | 100%                                              |
|                | rs5030656   | 100%                                        | 100%                                              |
|                | rs59421388  | 100%                                        | 100%                                              |
|                | rs267608319 | 100%                                        | 100%                                              |
| <i>SLCO1B1</i> | rs4149056   | 100%                                        | 100%                                              |

**Table 5** Intra-precision and inter-precision for *CYP2D6* Copy Number

| Sample | Variant  | Average Copy Number | Sample Size, n | Coefficient of Variation |                 |
|--------|----------|---------------------|----------------|--------------------------|-----------------|
|        |          |                     |                | Intra-precision          | Inter-precision |
| 221374 | Intron 2 | 2                   | 11             | 4%                       | 6%              |
|        | Exon 9   | 1                   |                | 5%                       | 5%              |
| 222660 | Intron 2 | 2                   | 9              | 3%                       | 5%              |
|        | Exon 9   | 2                   |                | 4%                       | 6%              |
| 222769 | Intron 2 | 3                   | 22             | 4%                       | 10%             |
|        | Exon 9   | 2                   |                | 6%                       | 13%             |

**Table 6** Genotype concordance for genes *CYP2C9*, *CYP2C19*, *CYP2D6* and *SLCO1B1*

| Gene                   | Variant               | Genotype      | Sample Size Per Genotype <sup>†</sup> | Concordance to Benchmark, % <sup>‡</sup> | Discordant Calls By Nala PGx Core™ <sup>§</sup> |
|------------------------|-----------------------|---------------|---------------------------------------|------------------------------------------|-------------------------------------------------|
| <i>CYP2C9</i>          | rs1799853<br>N = 225  | C/C           | 212                                   | 100.0                                    | 0                                               |
|                        |                       | C/T           | 13                                    |                                          | 0                                               |
|                        |                       | T/T           | 0                                     |                                          | 0                                               |
|                        | rs1057910<br>N = 225  | A/A           | 204                                   | 100.0                                    | 0                                               |
|                        |                       | A/C           | 21                                    |                                          | 0                                               |
|                        |                       | C/C           | 0                                     |                                          | 0                                               |
| <i>CYP2C19</i>         | rs4244285<br>N = 225  | G/G           | 121                                   | 96.9                                     | 1                                               |
|                        |                       | A/G           | 89                                    |                                          | 2                                               |
|                        |                       | A/A           | 15                                    |                                          | 4                                               |
|                        | rs4986893<br>N = 225  | G/G           | 206                                   | 98.7                                     | 2                                               |
|                        |                       | A/G           | 19                                    |                                          | 1                                               |
|                        |                       | A/A           | 0                                     |                                          | 0                                               |
|                        | rs12248560<br>N = 225 | C/C           | 0                                     | 100.0                                    | 0                                               |
|                        |                       | C/T           | 0                                     |                                          | 0                                               |
|                        |                       | T/T           | 0                                     |                                          | 0                                               |
| <i>CYP2D6</i>          | rs1065852<br>N = 225  | G/G           | 77                                    | 99.6                                     | 0                                               |
|                        |                       | A/G           | 76                                    |                                          | 1                                               |
|                        |                       | A/A           | 72                                    |                                          | 0                                               |
|                        | rs5030655<br>N = 225  | A/A           | 224                                   | 100.0                                    | 0                                               |
|                        |                       | delA/A        | 1                                     |                                          | 0                                               |
|                        |                       | delA/delA     | 0                                     |                                          | 0                                               |
|                        | rs3892097<br>N = 225  | C/C           | 205                                   | 100.0                                    | 0                                               |
|                        |                       | C/T           | 16                                    |                                          | 0                                               |
|                        |                       | T/T           | 4                                     |                                          | 0                                               |
|                        | rs35742686<br>N = 225 | T/T           | 225                                   | 100.0                                    | 0                                               |
|                        |                       | delT/T        | 0                                     |                                          | 0                                               |
|                        |                       | delT/delT     | 0                                     |                                          | 0                                               |
|                        | rs16947<br>N = 225    | G/G           | 145                                   | 96.9                                     | 2                                               |
|                        |                       | A/G           | 64                                    |                                          | 4                                               |
|                        |                       | A/A           | 16                                    |                                          | 1                                               |
|                        | rs28371725<br>N = 225 | C/C           | 204                                   | 100.0                                    | 0                                               |
|                        |                       | C/T           | 19                                    |                                          | 0                                               |
|                        |                       | T/T           | 2                                     |                                          | 0                                               |
|                        | rs1135840<br>N = 225  | C/C           | 33                                    | 97.8                                     | 1                                               |
|                        |                       | C/G           | 68                                    |                                          | 1                                               |
|                        |                       | G/G           | 124                                   |                                          | 3                                               |
|                        | rs769258<br>N = 225   | C/C           | 220                                   | 100.0                                    | 0                                               |
|                        |                       | C/T           | 5                                     |                                          | 0                                               |
|                        |                       | T/T           | 0                                     |                                          | 0                                               |
|                        | rs5030865<br>N = 225  | C/C           | 222                                   | 99.6                                     | 0                                               |
|                        |                       | C/T           | 3                                     |                                          | 1                                               |
|                        |                       | T/T           | 0                                     |                                          | 0                                               |
|                        | rs5030656<br>N = 225  | CTT/CTT       | 224                                   | 100.0                                    | 0                                               |
|                        |                       | delCTT/CTT    | 1                                     |                                          | 0                                               |
|                        |                       | delCTT/delCTT | 0                                     |                                          | 0                                               |
|                        | rs59421388<br>N = 225 | C/C           | 224                                   | 100.0                                    | 0                                               |
|                        |                       | C/T           | 1                                     |                                          | 0                                               |
|                        |                       | T/T           | 0                                     |                                          | 0                                               |
| rs267608319<br>N = 225 | C/C                   | 225           | 100.0                                 | 0                                        |                                                 |
|                        | C/T                   | 0             |                                       | 0                                        |                                                 |
|                        | T/T                   | 0             |                                       | 0                                        |                                                 |
| <i>SLCO1B1</i>         | rs4149056<br>N = 225  | T/T           | 182                                   | 97.3                                     | 2                                               |
|                        |                       | C/T           | 42                                    |                                          | 4                                               |
|                        |                       | C/C           | 1                                     |                                          | 0                                               |

<sup>†</sup>“Sample Size Per Genotype” reflects the counts of each genotype as produced by the benchmark, and not by Nala PGx Core™.

<sup>‡</sup>Refer to Table 1 for an outline of the benchmark methods used per variant.

<sup>§</sup>Discordant calls refer to instances in which Nala PGx Core™ did not produce a genotype call concordant with the benchmark.

**Table 7** Genotype concordance for *CYP2D6* Intron 2 And Exon 9 Copy Number Variations

| Gene          | Variant                    | Copy Number | Sample Size Per Copy Number <sup>†</sup> | Concordance to Benchmark, % <sup>‡</sup> | Discordant Calls By Nala PGx Core™ <sup>§</sup> |
|---------------|----------------------------|-------------|------------------------------------------|------------------------------------------|-------------------------------------------------|
| <i>CYP2D6</i> | <b>Intron 2</b><br>N = 224 | 0           | 0                                        | 99.6                                     | 0                                               |
|               |                            | 1           | 12                                       |                                          | 0                                               |
|               |                            | 2           | 130                                      |                                          | 0                                               |
|               |                            | >=3         | 82                                       |                                          | 1                                               |
|               | <b>Exon 9</b><br>N = 224   | 0           | 0                                        | 98.7                                     | 0                                               |
|               |                            | 1           | 24                                       |                                          | 1                                               |
|               |                            | 2           | 193                                      |                                          | 2                                               |
|               |                            | >=3         | 7                                        |                                          | 0                                               |

<sup>†</sup> Sample Size Per Copy Number<sup>†</sup> reflects the counts of each copy number call as produced by the benchmark, and not by Nala PGx Core™

<sup>‡</sup> Refer to Table 1 for an outline of the benchmark methods used per variant.

<sup>§</sup> Discordant calls refer to instances in which Nala PGx Core™ did not produce a copy number call concordant with the benchmark.

**Table 8** Diplotype concordance for *CYP2C9*, *CYP2C19* and *CYP2D6* between Nala PGx Core™, and Agena VeriDose® Core and *CYP2D6* CNV Panel

| Genes          | Concordance, % <sup>†</sup> | Discordant Diplotypes                            |                |           |
|----------------|-----------------------------|--------------------------------------------------|----------------|-----------|
|                |                             | Agena VeriDose® Core and <i>CYP2D6</i> CNV Panel | Nala PGx Core™ | Instances |
| <i>CYP2C9</i>  | 100% (n = 213)              | NA                                               | NA             | NA        |
| <i>CYP2C19</i> | 96.4% (n = 223)             | *1/*1                                            | *1/*3          | 1         |
|                |                             | *1/*2                                            | *1/*1          | 1         |
|                |                             | *1/*2                                            | *1/*3          | 1         |
|                |                             | *1/*3                                            | *2/*2          | 1         |
|                |                             | *2/*2                                            | *1/*1          | 2         |
|                |                             | *2/*2                                            | *1/*2          | 2         |
| <i>CYP2D6</i>  | 94.7% (n = 209)             | *1/*1                                            | *2/*2          | 1         |
|                |                             | *1/*10                                           | *1/*10, CN >=3 | 1         |
|                |                             | *1/*41                                           | *39/*41        | 1         |
|                |                             | *2/*2                                            | *1/*1          | 1         |
|                |                             | *2/*10                                           | *1/*10         | 1         |
|                |                             | *2/*36, CN >=3                                   | *2/*10, CN >=3 | 1         |
|                |                             | *4/*36                                           | *4/*10         | 2         |
|                |                             | *10/*36                                          | *2/*36         | 1         |
|                |                             | *13 *1/*10                                       | *1/*10, CN >=3 | 1         |
|                |                             | *13 *1/*41, CN = 1                               | *1/*41         | 1         |

<sup>†</sup>The concordance presented in this table excludes samples that have mismatches in diplotype calls arising from technological differences between platforms. Please refer to Supplementary Table 7 for a detailed breakdown of all diplotypes detected.

**Table 9** Observed allele frequencies by ethnicity

| Gene                        | Allele or Variant      | Allele Frequencies (Per This Study) |         |       |        |           |         | Allele Frequencies (PharmGKB) |                     |                    |
|-----------------------------|------------------------|-------------------------------------|---------|-------|--------|-----------|---------|-------------------------------|---------------------|--------------------|
|                             |                        | Indonesian                          | Chinese | Malay | Indian | Caucasian | Overall | East Asian                    | Central/South Asian | European           |
| <i>CYP2C9</i><br>(n = 206)  | *2                     | 0.000                               | 0.000   | 0.000 | 0.060  | 0.172     | 0.032   | 0.002                         | 0.114               | 0.127              |
|                             | *3                     | 0.000                               | 0.040   | 0.039 | 0.100  | 0.069     | 0.044   | 0.038                         | 0.110               | 0.076              |
| <i>CYP2C19</i><br>(n = 201) | *2                     | 0.297                               | 0.274   | 0.289 | 0.229  | 0.138     | 0.256   | 0.284                         | 0.270               | 0.147              |
|                             | *3                     | 0.041                               | 0.055   | 0.066 | 0.000  | 0.017     | 0.042   | 0.072                         | 0.016               | 0.002              |
|                             | *17                    | 0.054                               | 0.007   | 0.039 | 0.229  | 0.138     | 0.067   | 0.021                         | 0.171               | 0.216              |
| <i>CYP2D6</i><br>(n = 195)  | *2                     | 0.088                               | 0.118   | 0.167 | 0.140  | 0.196     | 0.136   | 0.121                         | 0.295               | 0.277              |
|                             | *4                     | 0.000                               | 0.035   | 0.069 | 0.020  | 0.161     | 0.051   | 0.005                         | 0.091               | 0.185              |
|                             | *5                     | 0.029                               | 0.028   | 0.028 | 0.080  | 0.000     | 0.031   | 0.049                         | 0.046               | 0.030              |
|                             | *6                     | 0.000                               | 0.000   | 0.000 | 0.000  | 0.018     | 0.003   | 0.000                         | 0.000               | 0.011              |
|                             | *9                     | 0.000                               | 0.000   | 0.000 | 0.000  | 0.018     | 0.003   | 0.002                         | 0.003               | 0.028              |
|                             | *10                    | 0.338                               | 0.299   | 0.222 | 0.160  | 0.143     | 0.251   | 0.436                         | 0.087               | 0.016              |
|                             | *14                    | 0.000                               | 0.014   | 0.000 | 0.000  | 0.000     | 0.005   | 0.003                         | ND                  | 0.000              |
|                             | *29                    | 0.000                               | 0.000   | 0.000 | 0.000  | 0.018     | 0.003   | 0.000                         | 0.003               | 0.001              |
|                             | *36                    | 0.206                               | 0.250   | 0.181 | 0.160  | 0.054     | 0.190   | 0.012                         | 0.000               | 0.000              |
| <i>SLCO1B1</i><br>(n = 203) | rs4149056 <sup>†</sup> | 0.125                               | 0.074   | 0.026 | 0.040  | 0.167     | 0.084   | 0.125 <sup>‡</sup>            | 0.050 <sup>‡</sup>  | 0.159 <sup>‡</sup> |

"ND" refers to instances in which no data is available for the given allele on PharmGKB.

<sup>†</sup>rs4149056 refers to the reduced function variant of *SLCO1B1* that is present in *SLCO1B1*\*5, *SLCO1B1*\*15 and *SLCO1B1*\*17.

<sup>‡</sup>Allele frequency values for rs4149056 have been obtained from gnomAD.

**Figure 1. *CYP2D6*\*36 Frequency By Ethnicity.** Distribution of individuals carrying one or two copies of the *CYP2D6*\*36 allele among the study cohort (n=205), grouped per ethnicity

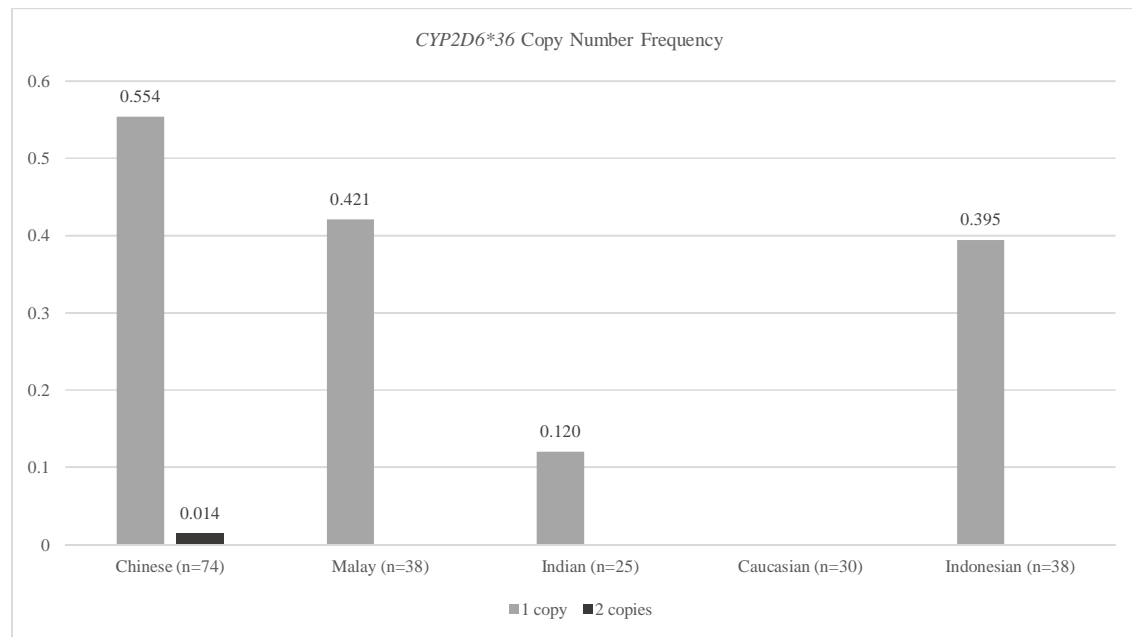

**Table 10** Observed diplotype frequencies by ethnicity

| Gene           | Diplotype       | Phenotype <sup>‡</sup> | Diplotype Frequencies (Per This Study) <sup>†</sup> |       |         |       |       |       |        |       |           |       |         |       |
|----------------|-----------------|------------------------|-----------------------------------------------------|-------|---------|-------|-------|-------|--------|-------|-----------|-------|---------|-------|
|                |                 |                        | Indonesian                                          |       | Chinese |       | Malay |       | Indian |       | Caucasian |       | Overall |       |
|                |                 |                        | Obs                                                 | Freq  | Obs     | Freq  | Obs   | Freq  | Obs    | Freq  | Obs       | Freq  | Obs     | Freq  |
| <i>CYP2C9</i>  | *1/*1           | NM                     | 39                                                  | 1.000 | 69      | 0.920 | 35    | 0.921 | 17     | 0.680 | 16        | 0.552 | 176     | 0.854 |
|                | *1/*2           | IM                     | 0                                                   | 0.000 | 0       | 0.000 | 0     | 0.000 | 3      | 0.120 | 9         | 0.310 | 12      | 0.058 |
|                | *1/*3           | IM                     | 0                                                   | 0.000 | 6       | 0.080 | 3     | 0.079 | 5      | 0.200 | 3         | 0.103 | 17      | 0.083 |
|                | *2/*3           | PM                     | 0                                                   | 0.000 | 0       | 0.000 | 0     | 0.000 | 0      | 0.000 | 1         | 0.034 | 1       | 0.005 |
| <i>CYP2C19</i> | *1/*1           | NM                     | 10                                                  | 0.270 | 31      | 0.425 | 14    | 0.368 | 8      | 0.333 | 14        | 0.483 | 77      | 0.383 |
|                | *1/*2           | IM                     | 19                                                  | 0.514 | 28      | 0.384 | 14    | 0.368 | 5      | 0.208 | 7         | 0.241 | 73      | 0.363 |
|                | *1/*3           | IM                     | 3                                                   | 0.081 | 6       | 0.082 | 3     | 0.079 | 0      | 0.000 | 1         | 0.034 | 13      | 0.065 |
|                | *1/*17          | RM                     | 3                                                   | 0.081 | 1       | 0.014 | 1     | 0.026 | 5      | 0.208 | 5         | 0.172 | 15      | 0.075 |
|                | *2/*2           | PM                     | 1                                                   | 0.027 | 5       | 0.068 | 3     | 0.079 | 1      | 0.042 | 0         | 0.000 | 10      | 0.050 |
|                | *2/*3           | PM                     | 0                                                   | 0.000 | 2       | 0.027 | 2     | 0.053 | 0      | 0.000 | 0         | 0.000 | 4       | 0.020 |
|                | *2/*17          | IM                     | 1                                                   | 0.027 | 0       | 0.000 | 0     | 0.000 | 4      | 0.167 | 1         | 0.034 | 6       | 0.030 |
|                | *17/*17         | UM                     | 0                                                   | 0.000 | 0       | 0.000 | 1     | 0.026 | 1      | 0.042 | 1         | 0.034 | 3       | 0.015 |
| <i>CYP2D6</i>  | *1/*1           | NM                     | 6                                                   | 0.176 | 7       | 0.097 | 5     | 0.139 | 4      | 0.160 | 2         | 0.071 | 24      | 0.123 |
|                | *1/*2           | NM                     | 0                                                   | 0.000 | 2       | 0.028 | 2     | 0.056 | 3      | 0.120 | 3         | 0.107 | 10      | 0.051 |
|                | *1/*2, CN >=3   | UM                     | 0                                                   | 0.000 | 0       | 0.000 | 0     | 0.000 | 1      | 0.040 | 1         | 0.036 | 2       | 0.010 |
|                | *1/*4           | IM                     | 0                                                   | 0.000 | 2       | 0.028 | 1     | 0.028 | 0      | 0.000 | 4         | 0.143 | 7       | 0.036 |
|                | *1/*5           | IM                     | 0                                                   | 0.000 | 2       | 0.028 | 1     | 0.028 | 1      | 0.040 | 0         | 0.000 | 4       | 0.021 |
|                | *1/*6           | IM                     | 0                                                   | 0.000 | 0       | 0.000 | 0     | 0.000 | 0      | 0.000 | 1         | 0.036 | 1       | 0.005 |
|                | *1/*10          | NM                     | 4                                                   | 0.118 | 3       | 0.042 | 2     | 0.056 | 2      | 0.080 | 2         | 0.071 | 13      | 0.067 |
|                | *1/*14          | NM                     | 0                                                   | 0.000 | 1       | 0.014 | 0     | 0.000 | 0      | 0.000 | 0         | 0.000 | 1       | 0.005 |
|                | *1/*29          | NM                     | 0                                                   | 0.000 | 0       | 0.000 | 0     | 0.000 | 0      | 0.000 | 1         | 0.036 | 1       | 0.005 |
|                | *1/*36          | IM                     | 3                                                   | 0.088 | 3       | 0.042 | 5     | 0.139 | 4      | 0.160 | 0         | 0.000 | 15      | 0.077 |
|                | *1/*41          | NM                     | 1                                                   | 0.029 | 2       | 0.028 | 1     | 0.028 | 0      | 0.000 | 2         | 0.071 | 6       | 0.031 |
|                | *1/*41, CN >=3  | UM                     | 0                                                   | 0.000 | 0       | 0.000 | 0     | 0.000 | 1      | 0.040 | 0         | 0.000 | 1       | 0.005 |
|                | *2/*2           | NM                     | 0                                                   | 0.000 | 1       | 0.014 | 1     | 0.028 | 1      | 0.040 | 1         | 0.036 | 4       | 0.021 |
|                | *2/*4           | IM                     | 0                                                   | 0.000 | 0       | 0.000 | 1     | 0.028 | 0      | 0.000 | 2         | 0.071 | 3       | 0.015 |
|                | *2/*5           | IM                     | 0                                                   | 0.000 | 0       | 0.000 | 1     | 0.028 | 1      | 0.040 | 0         | 0.000 | 2       | 0.010 |
|                | *2/*10          | NM                     | 4                                                   | 0.118 | 4       | 0.056 | 4     | 0.111 | 0      | 0.000 | 1         | 0.036 | 13      | 0.067 |
|                | *2/*14          | NM                     | 0                                                   | 0.000 | 1       | 0.014 | 0     | 0.000 | 0      | 0.000 | 0         | 0.000 | 1       | 0.005 |
|                | *2/*36          | IM                     | 2                                                   | 0.059 | 4       | 0.056 | 2     | 0.056 | 0      | 0.000 | 1         | 0.036 | 9       | 0.046 |
|                | *2/*41          | NM                     | 0                                                   | 0.000 | 4       | 0.056 | 0     | 0.000 | 0      | 0.000 | 1         | 0.036 | 5       | 0.026 |
|                | *4/*4           | PM                     | 0                                                   | 0.000 | 1       | 0.014 | 1     | 0.028 | 0      | 0.000 | 1         | 0.036 | 3       | 0.015 |
|                | *4/*5           | PM                     | 0                                                   | 0.000 | 0       | 0.000 | 0     | 0.000 | 1      | 0.040 | 0         | 0.000 | 1       | 0.005 |
|                | *4/*9           | IM                     | 0                                                   | 0.000 | 0       | 0.000 | 0     | 0.000 | 0      | 0.000 | 1         | 0.036 | 1       | 0.005 |
|                | *4/*10          | IM                     | 0                                                   | 0.000 | 1       | 0.014 | 1     | 0.028 | 0      | 0.000 | 0         | 0.000 | 2       | 0.010 |
|                | *5/*10          | IM                     | 0                                                   | 0.000 | 2       | 0.028 | 0     | 0.000 | 1      | 0.040 | 0         | 0.000 | 3       | 0.015 |
|                | *5/*41          | IM                     | 2                                                   | 0.059 | 0       | 0.000 | 0     | 0.000 | 0      | 0.000 | 0         | 0.000 | 2       | 0.010 |
|                | *10/*10         | IM                     | 3                                                   | 0.088 | 1       | 0.014 | 2     | 0.056 | 0      | 0.000 | 2         | 0.071 | 8       | 0.041 |
|                | *10/*10, CN >=3 | IM                     | 0                                                   | 0.000 | 1       | 0.014 | 0     | 0.000 | 0      | 0.000 | 0         | 0.000 | 1       | 0.005 |
|                | *10/*36         | IM                     | 9                                                   | 0.265 | 28      | 0.389 | 5     | 0.139 | 4      | 0.160 | 1         | 0.036 | 47      | 0.241 |
| *10/*41        | IM              | 0                      | 0.000                                               | 1     | 0.014   | 0     | 0.000 | 1     | 0.040  | 0     | 0.000     | 2     | 0.010   |       |
| *36/*41        | IM              | 0                      | 0.000                                               | 1     | 0.014   | 1     | 0.028 | 0     | 0.000  | 1     | 0.036     | 3     | 0.015   |       |

<sup>†</sup>"Obs" and "Freq" are abbreviations for "Observations" and "Frequency" respectively.

<sup>‡</sup>"NM", "IM", "PM" and "UM" are abbreviations for "Normal Metabolizer", "Intermediate Metabolizer", "Poor Metabolizer" and "Ultrarapid Metabolizer" respectively.

## **B. Supplementary Information**

**Supplementary Table 1.** Observed Genotype-Level Call Rates Per Variant Per Gene Per Platform, With Counts Of Successful And No Calls

**Supplementary Table 2.** Observed Diplotype-Level Call Rates Per Gene Per Platform, With Counts Of Successful And No Calls

**Supplementary Table 3.** Precision Analysis Of Nala PGx Core<sup>tm</sup>

**Supplementary Table 4.** Observed allele frequencies by ethnicity

**Supplementary Table 5.** *CYP2D6* Intron 2 And Exon 9 Observations And Frequencies By Ethnicity

**Supplementary Table 6.** *CYP2D6*\*36 Observations And Frequencies By Ethnicity

**Supplementary Table 7.** Diplotype Calls Observed Across All Samples Tested On Agena Veridose® Core And *CYP2D6* CNV Panel And Nala PGx Core<sup>TM</sup>

**Supplementary Table 8.** Raw And Reported Diplotype Concordance Values For Samples Tested On Agena Veridose® Core And *CYP2D6* CNV Panel And Nala PGx Core<sup>TM</sup>

**Supplementary Tables 9.1 to 9.18.** Raw genotype calls for rs1799853, rs1057910, rs4244285, rs4986893, rs12248560, rs1065852, rs5030655, rs3892097, rs35742686, rs16947, rs28371725, rs1135840, rs769258, rs5030865, rs5030656, rs59421388 and rs267608319, on Nala PGx Core<sup>TM</sup> and the corresponding benchmark methods, Agena VeriDose® Core and *CYP2D6* CNV Panel or TaqMan® DME Genotyping Assays

**Supplementary Table 9.19.** Raw variant calls for *CYP2D6* Intron 2 and Exon 9 on Agena VeriDose® Core and *CYP2D6* CNV Panel and Nala PGx Core<sup>TM</sup>

**Supplementary Figure 1. Observed *CYP2D6* Functional Copy Number Frequencies By Ethnicity.** Distribution of individuals carrying one, two or three or more copies of the *CYP2D6* functional gene among the study cohort (n=205), grouped per ethnicity.
